# Supplementary material for: Wave-wise comparative genomic study for revealing the complete scenario and dynamic nature of COVID-19 pandemic in Bangladesh
Source: PubMed Central journal article supplement (PMC8480844; doi:10.1371/journal.pone.0258019), 2021-09-29

# PLOS ONE

## Comparative Genomic Study for Revealing the Complete Scenario of COVID-19 Pandemic in Bangladesh --Manuscript Draft--

|                                                                                                                               |                                                                                                                                                                                                                                                                                                                                                                                                                                                                                                                                                                                                                                                                                                                                                                                                                                                                                                                                                                                                                                                                                                                                                                                                                                                                                                                                                                                                                                                                                                                                                                                                            |
|-------------------------------------------------------------------------------------------------------------------------------|------------------------------------------------------------------------------------------------------------------------------------------------------------------------------------------------------------------------------------------------------------------------------------------------------------------------------------------------------------------------------------------------------------------------------------------------------------------------------------------------------------------------------------------------------------------------------------------------------------------------------------------------------------------------------------------------------------------------------------------------------------------------------------------------------------------------------------------------------------------------------------------------------------------------------------------------------------------------------------------------------------------------------------------------------------------------------------------------------------------------------------------------------------------------------------------------------------------------------------------------------------------------------------------------------------------------------------------------------------------------------------------------------------------------------------------------------------------------------------------------------------------------------------------------------------------------------------------------------------|
| <b>Manuscript Number:</b>                                                                                                     | PONE-D-21-19985                                                                                                                                                                                                                                                                                                                                                                                                                                                                                                                                                                                                                                                                                                                                                                                                                                                                                                                                                                                                                                                                                                                                                                                                                                                                                                                                                                                                                                                                                                                                                                                            |
| <b>Article Type:</b>                                                                                                          | Research Article                                                                                                                                                                                                                                                                                                                                                                                                                                                                                                                                                                                                                                                                                                                                                                                                                                                                                                                                                                                                                                                                                                                                                                                                                                                                                                                                                                                                                                                                                                                                                                                           |
| <b>Full Title:</b>                                                                                                            | Comparative Genomic Study for Revealing the Complete Scenario of COVID-19 Pandemic in Bangladesh                                                                                                                                                                                                                                                                                                                                                                                                                                                                                                                                                                                                                                                                                                                                                                                                                                                                                                                                                                                                                                                                                                                                                                                                                                                                                                                                                                                                                                                                                                           |
| <b>Short Title:</b>                                                                                                           | Comparative Genomic Study for Revealing the Complete Scenario of COVID-19 Pandemic in Bangladesh                                                                                                                                                                                                                                                                                                                                                                                                                                                                                                                                                                                                                                                                                                                                                                                                                                                                                                                                                                                                                                                                                                                                                                                                                                                                                                                                                                                                                                                                                                           |
| <b>Corresponding Author:</b>                                                                                                  | Ishtiaque Ahammad<br>Bioinformatics Division, National Institute of Biotechnology, Ganakbari, Ashulia, Savar, Dhaka-1349, Bangladesh.<br>Dhaka, BANGLADESH                                                                                                                                                                                                                                                                                                                                                                                                                                                                                                                                                                                                                                                                                                                                                                                                                                                                                                                                                                                                                                                                                                                                                                                                                                                                                                                                                                                                                                                 |
| <b>Keywords:</b>                                                                                                              | SARS-CoV-2; COVID-19; Comparative Genomics; Molecular Dynamics Simulation; Bangladesh                                                                                                                                                                                                                                                                                                                                                                                                                                                                                                                                                                                                                                                                                                                                                                                                                                                                                                                                                                                                                                                                                                                                                                                                                                                                                                                                                                                                                                                                                                                      |
| <b>Abstract:</b>                                                                                                              | <p>As the COVID-19 pandemic continues to ravage across the globe and take millions of lives and like many parts of the world, the second wave of the pandemic hit Bangladesh, this study aimed at understanding its causative agent, SARS-CoV-2 at the genomic and proteomic level and provide precious insights about the pathogenesis, evolution, strengths and weaknesses of the virus. As of Mid-June 2021, over 1500 SARS-CoV-2 genomes have been sequenced across the country. From our analyses, it was discovered that the wave-2 samples had a significantly greater average rate of mutation/sample (30.79%) than the wave-1 samples (12.32%). Wave-2 samples also had a higher frequency of deletion, and transversion events. During the first wave, the GR clade was the most predominant but it was replaced by the GH clade in the latter wave. The B.1.1.25 variant showed the highest frequency in wave-1 while in case of wave-2, the B.1.351.3 variant, was the most common one. A notable presence of the delta variant, which is currently at the center of concern, was also observed.</p> <p>Comparison of the Spike protein found in the reference and the 3 most common lineages found in Bangladesh namely, B.1.1.7, B.1.351, B.1.617 in terms of their ability to form stable complexes with ACE2 receptor revealed that B.1.617 had the potential to be more transmissible than others. Importantly, no indigenous variants have been detected so far which implies that the successful prevention of import of foreign variants can diminish the outbreak in the country.</p> |
| <b>Order of Authors:</b>                                                                                                      | <p>Ishtiaque Ahammad</p> <p>Mohammad Uzzal Hossain</p> <p>Anisur Rahman</p> <p>Zeshan Mahmud Chowdhury</p> <p>Arittra Bhattacharjee</p> <p>Keshob Chandra Das</p> <p>Chaman Ara Keya</p> <p>Md. Salimullah</p>                                                                                                                                                                                                                                                                                                                                                                                                                                                                                                                                                                                                                                                                                                                                                                                                                                                                                                                                                                                                                                                                                                                                                                                                                                                                                                                                                                                             |
| <b>Additional Information:</b>                                                                                                |                                                                                                                                                                                                                                                                                                                                                                                                                                                                                                                                                                                                                                                                                                                                                                                                                                                                                                                                                                                                                                                                                                                                                                                                                                                                                                                                                                                                                                                                                                                                                                                                            |
| <b>Question</b>                                                                                                               | <b>Response</b>                                                                                                                                                                                                                                                                                                                                                                                                                                                                                                                                                                                                                                                                                                                                                                                                                                                                                                                                                                                                                                                                                                                                                                                                                                                                                                                                                                                                                                                                                                                                                                                            |
| <b>Financial Disclosure</b>                                                                                                   | The author(s) received no specific funding for this work.                                                                                                                                                                                                                                                                                                                                                                                                                                                                                                                                                                                                                                                                                                                                                                                                                                                                                                                                                                                                                                                                                                                                                                                                                                                                                                                                                                                                                                                                                                                                                  |
| Enter a financial disclosure statement that describes the sources of funding for the work included in this submission. Review |                                                                                                                                                                                                                                                                                                                                                                                                                                                                                                                                                                                                                                                                                                                                                                                                                                                                                                                                                                                                                                                                                                                                                                                                                                                                                                                                                                                                                                                                                                                                                                                                            |

the [submission guidelines](#) for detailed requirements. View published research articles from [PLOS ONE](#) for specific examples.

This statement is required for submission and **will appear in the published article** if the submission is accepted. Please make sure it is accurate.

#### Unfunded studies

Enter: *The author(s) received no specific funding for this work.*

#### Funded studies

Enter a statement with the following details:

- Initials of the authors who received each award
- Grant numbers awarded to each author
- The full name of each funder
- URL of each funder website
- Did the sponsors or funders play any role in the study design, data collection and analysis, decision to publish, or preparation of the manuscript?
- **NO** - Include this sentence at the end of your statement: *The funders had no role in study design, data collection and analysis, decision to publish, or preparation of the manuscript.*
- **YES** - Specify the role(s) played.

\* typeset

#### Competing Interests

Use the instructions below to enter a competing interest statement for this submission. On behalf of all authors, disclose any [competing interests](#) that could be perceived to bias this work—acknowledging all financial support and any other relevant financial or non-financial competing interests.

This statement is **required** for submission and **will appear in the published article** if the submission is accepted. Please make sure it is accurate and that any funding sources listed in your Funding Information later in the submission form are also

The authors have declared that no competing interests exist.

declared in your Financial Disclosure statement.

View published research articles from [PLOS ONE](#) for specific examples.

**NO authors have competing interests**

Enter: *The authors have declared that no competing interests exist.*

**Authors with competing interests**

Enter competing interest details beginning with this statement:

*I have read the journal's policy and the authors of this manuscript have the following competing interests: [insert competing interests here]*

\* typeset

**Ethics Statement**

N/A

Enter an ethics statement for this submission. This statement is required if the study involved:

- Human participants
- Human specimens or tissue
- Vertebrate animals or cephalopods
- Vertebrate embryos or tissues
- Field research

Write "N/A" if the submission does not require an ethics statement.

General guidance is provided below. Consult the [submission guidelines](#) for detailed instructions. **Make sure that all information entered here is included in the Methods section of the manuscript.**

**Format for specific study types**

**Human Subject Research (involving human participants and/or tissue)**

- Give the name of the institutional review board or ethics committee that approved the study
- Include the approval number and/or a statement indicating approval of this research
- Indicate the form of consent obtained (written/oral) or the reason that consent was not obtained (e.g. the data were analyzed anonymously)

**Animal Research (involving vertebrate animals, embryos or tissues)**

- Provide the name of the Institutional Animal Care and Use Committee (IACUC) or other relevant ethics board that reviewed the study protocol, and indicate whether they approved this research or granted a formal waiver of ethical approval
- Include an approval number if one was obtained
- If the study involved *non-human primates*, add *additional details* about animal welfare and steps taken to ameliorate suffering
- If anesthesia, euthanasia, or any kind of animal sacrifice is part of the study, include briefly which substances and/or methods were applied

**Field Research**

Include the following details if this study involves the collection of plant, animal, or other materials from a natural setting:

- Field permit number
- Name of the institution or relevant body that granted permission

**Data Availability**

Authors are required to make all data underlying the findings described fully available, without restriction, and from the time of publication. PLOS allows rare exceptions to address legal and ethical concerns. See the [PLOS Data Policy](#) and [FAQ](#) for detailed information.

Yes - all data are fully available without restriction

A Data Availability Statement describing where the data can be found is required at submission. Your answers to this question constitute the Data Availability Statement and **will be published in the article**, if accepted.

**Important:** Stating 'data available on request from the author' is not sufficient. If your data are only available upon request, select 'No' for the first question and explain your exceptional situation in the text box.

Do the authors confirm that all data underlying the findings described in their manuscript are fully available without restriction?

**Describe where the data may be found in full sentences. If you are copying our sample text, replace any instances of XXX with the appropriate details.**

- If the data are **held or will be held in a public repository**, include URLs, accession numbers or DOIs. If this information will only be available after acceptance, indicate this by ticking the box below. For example: *All XXX files are available from the XXX database (accession number(s) XXX, XXX).*
- If the data are all contained **within the manuscript and/or Supporting Information files**, enter the following: *All relevant data are within the manuscript and its Supporting Information files.*
- If neither of these applies but you are able to provide **details of access elsewhere**, with or without limitations, please do so. For example:

*Data cannot be shared publicly because of [XXX]. Data are available from the XXX Institutional Data Access / Ethics Committee (contact via XXX) for researchers who meet the criteria for access to confidential data.*

*The data underlying the results presented in the study are available from (include the name of the third party*

All relevant data are within the manuscript and its Supporting Information files.

|                                                                                                                                                                                                                                         |                                                                                                                                                                                                                                                                                                                       |
|-----------------------------------------------------------------------------------------------------------------------------------------------------------------------------------------------------------------------------------------|-----------------------------------------------------------------------------------------------------------------------------------------------------------------------------------------------------------------------------------------------------------------------------------------------------------------------|
| <p><i>and contact information or URL).</i></p> <ul style="list-style-type: none"><li>• This text is appropriate if the data are owned by a third party and authors do not have permission to share the data.</li></ul> <p>* typeset</p> |                                                                                                                                                                                                                                                                                                                       |
| Additional data availability information:                                                                                                                                                                                               | Tick here if the URLs/accession numbers/DOIs will be available only after acceptance of the manuscript for publication so that we can ensure their inclusion before publication.; Tick here if your circumstances are not covered by the questions above and you need the journal's help to make your data available. |

1 **Comparative genomic study for revealing the complete scenario of**  
2 **COVID-19 pandemic in Bangladesh**

3 Ishtiaque Ahammad<sup>1#</sup>, Mohammad Uzzal Hossain<sup>1#</sup>, Anisur Rahman<sup>2#</sup>, Zeshan Mahmud  
4 Chowdhury<sup>3</sup>, Arittra Bhattacharjee<sup>1</sup>, Keshob Chandra Das<sup>4</sup>, Chaman Ara Keya<sup>3</sup>, Md.  
5 Salimullah<sup>4\*</sup>

6 *<sup>1</sup>Bioinformatics Division, National Institute of Biotechnology, Ganakbari, Ashulia, Savar, Dhaka-*  
7 *1349, Bangladesh*

8 *<sup>2</sup>Department of Biotechnology and Genetic Engineering, Noakhali Science and Technology*  
9 *University, Sonapur, Noakhali-3814, Bangladesh*

10 *<sup>3</sup>Department of Biochemistry and Microbiology, North South University, Bashundhara, Dhaka-*  
11 *1229, Bangladesh*

12 *<sup>4</sup>Molecular Biotechnology Division, National Institute of Biotechnology, Ganakbari, Ashulia,*  
13 *Savar, Dhaka-1349, Bangladesh*

14 **\*Corresponding Author:**

15 Dr. Md. Salimullah

16 Chief Scientific Officer

17 Molecular Biotechnology Division

18 National Institute of Biotechnology

19 Ganakbari, Ashulia, Savar, Dhaka-1349, Bangladesh

20 Tel: 880-2-7788443

21 E-mail: [salim2969@gmail.com](mailto:salim2969@gmail.com)

22 #These authors contributed equally to this work

23

24

25 **Abstract**

26 As the COVID-19 pandemic continues to ravage across the globe and take millions of lives and  
27 like many parts of the world, the second wave of the pandemic hit Bangladesh, this study aimed  
28 at understanding its causative agent, SARS-CoV-2 at the genomic and proteomic level and provide  
29 precious insights about the pathogenesis, evolution, strengths and weaknesses of the virus. As of  
30 Mid-June 2021, over 1500 SARS-CoV-2 genomes have been sequenced across the country. From  
31 our analyses, it was discovered that the wave-2 samples had a significantly greater average rate of  
32 mutation/sample (30.79%) than the wave-1 samples (12.32%). Wave-2 samples also had a higher  
33 frequency of deletion, and transversion events. During the first wave, the GR clade was the most  
34 predominant but it was replaced by the GH clade in the latter wave. The B.1.1.25 variant showed  
35 the highest frequency in wave-1 while in case of wave-2, the B.1.351.3 variant, was the most  
36 common one. A notable presence of the delta variant, which is currently at the center of concern,  
37 was also observed. Comparison of the Spike protein found in the reference and the 3 most common  
38 lineages found in Bangladesh namely, B.1.1.7, B.1.351, B.1.617 in terms of their ability to form  
39 stable complexes with ACE2 receptor revealed that B.1.617 had the potential to be more  
40 transmissible than others. Importantly, no indigenous variants have been detected so far which  
41 implies that the successful prevention of import of foreign variants can diminish the outbreak in  
42 the country.

43 **Keywords**

44 SARS-CoV-2; COVID-19; Comparative Genomics; Molecular Dynamics Simulation; Bangladesh

45

46



## 47 **1. Introduction**

48 Severe Acute Respiratory Syndrome Coronavirus-2 (SARS-CoV-2), the causative agent of  
49 Coronavirus Disease-2019 (COVID-19), has already infected > 177,000,000 people and  
50 caused >3,800,000 deaths till mid-June, 2021) (1). Since the influenza outbreak of 1918 COVID-  
51 19 is the biggest pandemic of zoonotic origin that we are facing at a global scale (2). The first  
52 wave of the pandemic has passed and subsequent waves have already started in many countries  
53 (3–7). Insights regarding the transmission and evolution of the virus during these waves are  
54 essential to break the chain of infections (8,9). Genomic data can provide some of these crucial  
55 insights which can help make pragmatic public health policies (10,11). Besides, genomic  
56 surveillance can deliver a deep understanding of the virus' mechanism of survival and reduce  
57 fatality during new waves of infection (11–14)

58 The onset of SARS-CoV-2 occurred in Wuhan, Hubei Province, China in December, 2019 (15–  
59 17). Initially, clinicians diagnosed this disease as virus-induced pneumonia based on blood tests  
60 and chest radiographs. Later, genomic and phylogenetic data analysis led to the recognition of the  
61 pathogen as a member of the *Coronaviridae* family (18). *Coronaviridae* family encompasses the  
62 largest known enveloped, single stranded RNA viruses with a genome size ranging from 25-32  
63 kilo base pairs (Kb) (19,20). The family is divided into two subfamilies, the *Coronavirinae* and  
64 the *Toronavirinae*. The subfamily *Coronavirinae* is further organized genotypically and  
65 serologically into 4 genera:  $\alpha$ ,  $\beta$ ,  $\gamma$ , and  $\delta$ -CoVs (21). The *betacoronavirus* genus is comprised of  
66 the Severe Acute Respiratory Syndrome (SARS)-CoV which had been identified for the first time  
67 in 2002-2003 and the Middle East Respiratory Syndrome (MERS)-CoV in 2012. The genome  
68 sequences of SARS-Cov-2 has a 79.6% identity with SARS-CoV/ SARS-CoV-1 and 67.06%

69 identity with MERS-CoV, indicating that they belong to the *betacoronavirus* genus (22). All  
70 human coronaviruses are considered to be of zoonotic origin, with Chinese bats being the most  
71 likely host for SARS-CoV-2 (23–25). Genetically, about 96% identity was observed between  
72 SARS-CoV-2 and bat coronavirus (BatCoV RaTG13)(18). However, since bat habitats remain  
73 distanced from human life, an intermediate animal such as pangolin might have acted as an  
74 intermediate shuttle before transmitting to its human hosts (26–30).

75 The Chinese Center for Disease Control and Prevention (CDC) primarily suggested the Huanan  
76 local seafood market as the origin of the COVID-19 outbreak (31). Despite this claim, none of the  
77 animals in the area were tested positive for the virus. This indicated that the virus had already  
78 moved out of Wuhan, long before the outbreak came under spotlight. Since then the control of  
79 viral transmission through non-therapeutic interventions suggested by the World Health  
80 Organization (WHO) had been attempted (32). However, the violation of these preventive  
81 measures and absence of proper antiviral therapeutics and vaccinations led to an uncontrollable  
82 global transmission of the disease. The virus proliferated rapidly both inside and outside of China  
83 and finally reached each and every county of the world. In March 2020, the disease was declared  
84 as a global pandemic by the World Health Organization (WHO) (15). Although, at the beginning  
85 of the pandemic, the intensity of the disease was higher in the Europe and the America but later it  
86 also spread to Asian and South-East Asian countries (33–35).

87 Previously, the world went through three waves of the deadly Spanish flu until it subsided in 1919  
88 while the second wave being the deadliest. The reason behind this fatal phenomenon was the rapid  
89 dispersion of the virus to every corner of the world (36) . A similar pattern can be observed in the  
90 case of COVID-19. By late 2020s and early 2021, a resurgence of infections was experienced by  
91 most countries including the United States, Brazil, Belgium, France, UK, Germany, as well as

92 most of the Asian countries (37–39). Remarkably India, which survived the first wave relatively  
93 unscathed, is currently suffering from a spine-chilling situation with a higher mortality rate than  
94 most other countries seeing more than 2000 deaths per day (40).

95 A well-established fact is that all viruses undergo genetic drift over time due to selection pressure  
96 and give rise to a number of variants that challenge any pandemic response (41,42) Therefore,  
97 understanding the current variants are crucial in restricting the mode of transmission and  
98 developing new therapeutics against them. Multiple variants have been identified around the world  
99 so far including B.1.1.7 (43), B.1.351 (44), P.1 (45), B.1.427/B.1.429 (46) and B.1.617(47). The  
100 B.1.1.7 variant was first detected in the United Kingdom around September, 2020. Three different  
101 types of mutations were observed in this variant which were present in the receptor binding domain  
102 of the spike protein, the 69/70 deletion and the P681H mutation near the S1/S2 furin cleavage sites.  
103 The alpha or kent variant turns out to be mutating again. In December 2020, B.1.351 was spotted  
104 as the predominant variant in South Africa (48). The variant, sharing some mutations with B.1.1.7  
105 also had multiple mutations in their spike proteins such as K417N and E484K (49). The P.1 variant  
106 was first identified in Japan in a few travelers coming from Brazil in early January, 2021 (50).  
107 B.1.427 and B.1.429 variants were first detected in California in February 2021 (46). B.1.617.2 is  
108 the daunting variant of coronavirus that originated in India and has been circulating globally in at  
109 least 62 countries including the United States and United Kingdom (51). About 70% of the  
110 genome sequences submitted from India to GISAID constitute this variant. The major mutations  
111 in the delta variant includes substitution in the amino acid sequences of the spike protein (52,53).  
112 Bangladesh, being one of the most densely populated countries of the world with over 160 million  
113 people and sharing a porous border with India, remains one of the most vulnerable countries for  
114 the second wave of the COVID-19 pandemic. The country with limited resources and scarce

115 healthcare facilities experiences major challenges while combating this transmission. The first case  
116 of this virus in the country was confirmed in two men coming from Italy and a female relative by  
117 the Institute of Epidemiology, Disease Control and Research (IEDCR) on March 7<sup>th</sup>, 2020 (54)  
118 Although many Bangladeshi citizens came from Wuhan beforehand, they were reported to be  
119 negative for SARS-CoV-2. As a response, the Bangladesh government took a number of  
120 preventive measures including nationwide lockdowns, imposing restrictions on international  
121 flights, strengthening of screening procedures, and shutting down of educational institutions and  
122 so on (55). Despite several rounds of lockdowns, the rate of infections continued to reach high  
123 levels. Correspondingly, it became the second most affected country in Southeast Asia. Near the  
124 end of the first wave, it began to drop gradually since November 2020. Although the rate declined  
125 to its lowest during January and February, 2021, the cases began to rise again (56).

126 The first complete genome sequencing of the SARS-CoV-2 in Bangladesh was announced by the  
127 Child Health Research Foundation on 12<sup>th</sup> May, 2020 (57). Soon after, the National Institute of  
128 Biotechnology announced the sequencing of SARS-CoV-2 genome by Sanger sequencing method  
129 (58). The SARS-CoV-2 genome sequencing effort in Bangladesh flourished afterwards and as a  
130 result, 1569 genomes have been sequenced by June 6, 2020.

131 The goal of this study was to probe all these sequences and find some crucial answers regarding  
132 the genomic evolution of the virus, predominant variants, difference between the first and the  
133 second wave and so on which would make it easier to comprehend the trajectory of the pandemic  
134 and suggest appropriate counter measures.

135

136

## 137 **2. Materials and Methods**

### 138 **2.1 Retrieval of the SARS-CoV-2 Genome Sequences**

139 Genomes of SARS-CoV-2 isolates were retrieved from the Global Initiative on Sharing All  
140 Influenza Data (GISAID) database ([www.gisaid.org](http://www.gisaid.org)) (59). Isolates collected since the beginning  
141 of the COVID-19 pandemic till 31 Jan 2021 were considered as wave-1. (**Supplementary file 1**).  
142 and those collected between Feb 1, 2021 and Jun 6, 2021 were considered as wave-2 samples  
143 (**Supplementary file 2**).

### 144 **2.2 Wave-1 and Wave-2 Mutation Analysis**

145 The Wuhan genome reference sequence (NC\_045512.2) was retrieved from NCBI GenBank (60).  
146 A GFF3 annotation file of the reference sequence (**Supplementary file 3**), generated by Giorgi  
147 was used for extracting the genomic coordinates of SARS-CoV-2 proteins (61). The sequences  
148 from wave-1 and wave-2 were aligned separately against the reference sequence using the  
149 NUCMER (version 4.0.0rc1) command line tool (62). A SARS-CoV-2 annotation algorithm,  
150 developed by Mecatelli and Giorgi (61), was employed to convert the outputs of alignments into  
151 lists of mutational events. Frequency and the rate of mutation per sample was calculated. All the  
152 SARS-CoV-2 sequences from both waves were classified based on the type of mutation. Specific  
153 coordinates of the mutations on the SARS-CoV-2 genome were also identified. Finally, alterations  
154 in the proteome of SARS-CoV-2 as a result of genomic variation were investigated.  
155 **Supplementary file 4** contains a detailed report on this mutation analysis for both COVID-19  
156 pandemic waves in Bangladesh.

## 157 **2.3 Clade and Variant Analysis for Wave-1 and Wave-2**

158 For this analysis, both complete and incomplete sequences for wave-1 and wave-2 in the  
159 Bangladesh region were obtained from GISAID. The number of sequences for different clades was  
160 counted directly from this database. Assignment of different lineages for each sample from both  
161 waves was performed by pangolin (version v3.0.5, lineages version 2021-06-05) web server  
162 (<https://pangolin.cog-uk.io/>). For all sequences, Greek Alphabet names of relevant lineages, as  
163 well as their classes (VOC for variants of concern, VOI for variants of interest and Unclassified  
164 for other variants), were also ascribed. Percentage of occurrences for different clades and top ten  
165 variants were calculated via R commands. Finally, comparative plots were generated by using the  
166 ggplot2 package in R (63) to describe the distribution of SARS-CoV-2 clades and variants in  
167 Bangladesh.

## 168 **2.4 Molecular Docking between Spike Protein and ACE2**

169 The reference sequence of the Receptor Binding Domain (RBD) of SARS-CoV-2 spike  
170 glycoprotein (S) was taken from UniProt (<https://www.uniprot.org/>) (UniProt ID: P0DTC2) and  
171 was manually mutated to generate the sequence of the variants B.1.1.7, B.1.351, and B.1.617  
172 which were most common in Bangladesh. 3D models of all the sequences were built using Robetta  
173 (64) . The structure of the human ACE2 receptor was extracted from the RCSB PDB (PDB ID:  
174 6M0J). Docking between S-RBD and ACE2 was conducted by GalaxyTongDock\_A server (65).  
175 Following protein-protein docking, the generated models with the highest docking scores and  
176 cluster size were selected and submitted to PROtein binDIng enerGY prediction (PRODIGY) to  
177 calculate the binding affinity of the protein-protein complexes at physiological temperature (37 °C)  
178 (66).

## 179 **2.5 Molecular Dynamic Simulation of ACE2-Spike Protein Complex**

180 In order to evaluate the evaluate the stability of the complex between the ACE2 receptor and the  
181 SARS-CoV-2 Spike protein (Reference and the variants B.1.1.7, B.1.351, and B.1.617) under  
182 physiological conditions, 50 ns molecular dynamics simulation was executed with GRONingen  
183 MACHine for Chemical Simulations aka GROMACS (version 5.1.1) (67). The GROMOS96 43a1  
184 force-field was used for the simulation (68). 300 K temperature, pH 7.4, and 0.9% NaCl solution  
185 was used to define the physiological condition of the system. A dodecahedral box with its edges  
186 at 1 nm distance from the protein surface was drawn and the system was solvated with SPC (simple  
187 point charge) water model . Using the genion module inherent to GROMACS, the overall charge  
188 of the system was neutralized by adding 23 NA ions. The steepest descent minimization algorithm  
189 was utilized to carry out energy minimization of the system. Isothermal-isochoric (NVT)  
190 equilibration of the system was carried out for 100 ps with short-range electrostatic cutoff value  
191 of 1.2 nm. Then the Isobaric (NPT) equilibration of the system was carried out for 100 ps as well  
192 with short-range van der Waals cutoff fixed at 1.2 nm. Finally a 50 ns molecular dynamic  
193 simulation was done using periodic boundary conditions and time integration step of 2 fs. After  
194 every 100 ps, the energy of the system was recorded. The Particle Mesh Ewald (PME) method was  
195 employed for calculating the long range electrostatic potential. The short-range van der Waals  
196 cutoff was set to 1.2 nm. The simulation temperature was maintained using modified Berendsen  
197 thermostat while the pressure was made constant using the Parrinello-Rahman algorithm. An  
198 interval of 100 ps was used each snapshot for analyzing the trajectory data. Eventually the  
199 trajectory information gathered throughout the simulation were concatenated to calculate and plot  
200 root mean square deviation (RMSD), root mean square fluctuation (RMSF), radius of gyration  
201 (Rg) and solvent accessible surface area (SASA) data. MD simulations were performed on the

202 “bioinfo-server” running on Ubuntu 18.4.5 operating system located at the Bioinformatics  
203 Division, National Institute of Biotechnology.

204 In order to evaluate structural stability, Root Mean Square Deviation (RMSD) calculation was  
205 performed. The “rms” module built into the GROMACS software was utilized to extract RMSD  
206 information throughout the course of the simulation. The result can be plotted graphically using  
207 the Xmgrace package.

208 Root Mean Square Fluctuation (RMSF) measurement was used to determine the flexibility of  
209 local structures within the ACE2-Spike protein complex. The higher RMSF values corresponded  
210 to higher flexibility of a region. RMSF calculations were carried out using the “rmsf” module and  
211 the figures were generated using Xmgrace.

212 To determine the degree of compactness, the radius of gyration of the complex was calculated. A  
213 relatively steady value of radius of gyration means stable folding of a protein. Fluctuation of radius  
214 of gyration implies the unfolding of the protein. The “gyrate” module was used to generate the  
215 radius of gyration graphs for our proteins.

216 Hydrophobic interactions composed of non-polar amino acids are crucial for maintaining the  
217 stability of the hydrophobic core of proteins. They do so by covering the non-polar amino acids  
218 within the hydrophobic cores and keeping them at a distance from the solvent. Solvent Accessible  
219 Surface Area (SASA) is used in molecular dynamic simulations to predict the hydrophobic core  
220 stability of proteins. In this study, SASA was calculated using the “sasa” module and the resulting  
221 graph was visualized using Xmgrace.

## 222 **3. Results**



### 223 **3.1 SARS-CoV-2 Genomes from Bangladesh**

224 From the first instance of SARS-CoV-2 genome submission from Bangladesh (May 12, 2020) to  
225 the time of the present study (June 6, 2021), the GISAID database recorded 1569 SARS-CoV-2  
226 isolates from Bangladesh. According to our analysis, a total of 1074 samples belonged to wave-1  
227 and 495 samples to wave-2.

### 228 **3.2 Frequency of SARS-CoV-2 Mutations in Bangladesh**

229 In comparison to the Wuhan reference sequence, all sequences from both waves appeared to have  
230 two or more mutations (**Supplementary file 5**). The average number of mutations per sample was  
231 found to differ significantly between the two waves (**Fig 1**) based on two sided t-test  $p = 2.2 \times$   
232  $10^{-16}$ . The average rate of mutation in wave-2 samples (30.79%) was substantially higher than  
233 the wave-1 samples (12.32%). In the case of wave-1 (1074 samples), most of the sequences  
234 possessed 6 to 17 mutations per sample, while the majority of the sequences in wave-2 (495  
235 samples) tended to have 28 to 38 mutations (**Fig 2**).

236 **Fig 1: Density plot of average mutations per sample in case of wave-1 and wave-2.** The Red  
237 line and Blue line represent the average value of mutation per sample for wave-1 and wave-2  
238 respectively. Wave-2 samples generally possessed a higher number of mutations per sample than  
239 wave-1.

240 **Fig 2: Number of mutations per sample for wave-1 and wave-2.** The majority of sequences  
241 from wave-1 had 6 to 17 mutations per sample. On the other hand, most of the samples of wave-2  
242 possess on average 28 to 38 mutations.

### 243 **3.3 Type of SARS-CoV-2 Mutations in Bangladesh**

244 The occurrence of several classes of mutations, as well as the percentages of each class for both  
245 waves, are documented in the **Supplementary file 6**. Single-nucleotide polymorphisms (SNPs)  
246 seemed to be highly prevalent in both cases (58.89% in wave-1 and 61.5% in wave-2) (**Fig 3**).  
247 Extragenic mutations were also found to some extent, but all were either in 5'-UTR or in 3'-UTR  
248 regions. Wave-2 cases (943 events, 6.19%) had considerably more deletion events than wave-1  
249 instances (115 events, 0.87%). During the first surge of the pandemic, the insertion (0.03%),  
250 deletion\_stop(0.01%), or insertion\_stop(0.01%) events took place in a small fraction of cases, but  
251 not at all in the second phase.

252 **Fig 3: Distribution of mutation classes between two waves of COVID-19 in Bangladesh.**  
253 SNPs, silent SNPs, and extragenic mutations were similarly abundant in both waves. But,  
254 sequences of wave-2 had a significant amount of deletion events.

255 All mutational events were also classified into different variant types to explain the higher  
256 frequency of SNPs (**Supplementary file 7**). Though both SNP transitions (purine > purine,  
257 pyrimidine > pyrimidine) and transversion (purine > pyrimidine and vice versa ) were observed  
258 among all samples, C>T transition was the most frequent mutation in both waves (**Fig 4**). The  
259 percentage of occurrence of this transitional event was 45.75% in wave-1 and 42.44% in wave-2.  
260 While A>G transition is the second most common event in wave-1(12.53%), G>T transversion  
261 possessed this place in the case of wave-2(13.57%). Oligonucleotide deletion was also commonly  
262 present in the samples from wave-2. In the second wave of the COVID-19 pandemic in  
263 Bangladesh, two oligonucleotide deletion events (TCTGGTTTT and CTTGCTTTA) appeared to  
264 be much more pervasive (2.46% and 1.63% respectively).

265 **Fig 4: Most frequent mutational events per type between the two waves.** The C>T transition  
266 was highly prevalent in both waves. While A>G transition is the second most abundant event in

267 wave-1, samples from wave-2 had G>T transversion event.

### 268 **3.4 Genomic Location of the SARS-CoV-2 Mutations**

269 The presence of mutational changes in specific coordinates of the SARS-CoV-2 genome sequences  
270 was also analyzed in this study (**Supplementary file 8**). In both waves, the A23403G, C3037T,  
271 C14408T, and C241T mutations showed a similar pattern of abundance (**Fig 5**). Although the  
272 GGG28881AAC trinucleotide substitution was the 5th most prevailing event in the case of Wave-  
273 1, its existence was much lower in the case of Wave-2 ( only 0.75%). Rather TCTGGTTTT11288  
274 deletion was substantially more common in the second phase, which is consistent with previous  
275 findings of this study.

276 **Fig 5: Most frequent mutations at the nucleotide level in wave-1 and wave-2.** The first four  
277 nucleotide events were the most widespread for both waves in Bangladesh. Among them,  
278 A23403G, C3037T, and C241T mutations are characteristic features of G clade and its derivatives.  
279 Wave-2 showed a substantial frequency of the TCTGGTTTT oligonucleotide deletion at 11288  
280 position.

### 281 **3.5 Impact of Mutations on the SARS-CoV-2 Proteome**

282 We also summarized the impacts of these mutations on the protein sequence of SARS-CoV-2 in  
283 the final step of this mutational investigation (**Supplementary file 9**). The D614G (aspartate to  
284 glycine in the 614th amino acid) mutation in the spike protein of SARS-CoV-2 is caused by the  
285 most predominant nucleotide transversion (A > G) in the 23,403rd position. This mutation, a  
286 characteristic feature of the G-clade of SARS-CoV-2 genome, was observed in the highest  
287 frequency in the samples of both waves (**Fig 6**). From this observation it can be said that the G-

288 clade of this virus was ubiquitous in Bangladesh in the case of both waves, which we have also  
289 explicated later through the clade distribution analysis. Despite sorting by frequency, the pattern  
290 of dominance of S:D614G, NSP3:F106F, NSP12b:P314L and, 5'UTR:241 mutations was identical  
291 in both waves, however in wave-1, these mutations were at a somewhat greater percentage (8.01%,  
292 7.82%, 7.70% and, 7.48% respectively ) than other modifications. On the other hand, these  
293 mutations accounted for 3.24%, 3.22%, 3.11%, and 2.93% of total amino acid alteration events  
294 from wave-2 samples.

295 **Fig 6: Number of most frequent protein level alterations among two waves in Bangladesh.**

296 The four most frequent amino acid substituting events had the same type of distribution for both  
297 waves. Besides, some mutations in spike and nucleocapsid protein (e.g., S:N501Y, N:T205I,  
298 S:D80A ) were found in a significant amount in wave-2. Furthermore, the ORF3a:Q57H variant,  
299 which is a marker variant for GH clade, was also very common in this case.

300 **3.6 Distribution of SARS-CoV-2 Clades in Bangladesh**

301 Furthermore, the distribution of various SARS-CoV-2 clades and most frequent variants was also  
302 compared across two waves in Bangladesh (**Supplementary file 10**). Throughout the pandemic in  
303 Bangladesh, the G-clade and its derivatives (GH, GV, GR, GRY) continued to be dominant (**Fig**  
304 **7**). Although the GR clade was predominant during wave-1(75.86%), in wave-2 the GH clade took  
305 the lead (61.26%). However, the percentage of other G-clades was pretty much similar in both  
306 phases of the pandemic. On the contrary, in wave-1, the L, O, and S clades had a very low  
307 frequency, and in wave-2, the L and S clades disappeared. The variants from the B lineage were  
308 extremely common in wave-1, with B.1.1.25 accounting for 72.46% of the total (**Fig 8**). Besides,  
309 the alpha variant (B.1.1.7), a variant of concern, also showed up to some extent. In the scenario of

310 wave-2, however, the B.1.351.3 (57.44%) variant dominated throughout the entire time frame.  
 311 During this wave, there was also a progressive increase of VOC variants (alpha, beta, delta).

312 **Fig 7: Comparative distribution of different clades in two waves of COVID-19 pandemic in**  
 313 **Bangladesh.** G clade and its descendants dominated throughout the pandemic. But GR clade in  
 314 the case of wave-1 and GH clade in the case of wave-2 were the most prevalent ones. In the second  
 315 wave, the L, O, and S clades were almost completely lost.

316 **Fig 8: Prevalence of different variants (in percentage) observed in wave-1 and 2 of COVID-**  
 317 **19 pandemic in Bangladesh.** Almost all SARS-CoV-2 variants of wave-1 were from B lineage.  
 318 On the other hand, wave-2 had an increased number of VOC variants. The most prevalent  
 319 B.1.351.3 variant of this wave is a derivative of the beta (B.1.351) variant.

### 320 **3.7 Molecular Docking between the ACE2 and Spike Protein**

321 Molecular docking between human ACE2 receptor and the receptor binding domain (RBD) of  
 322 Spike protein found in the reference and the 3 most commonly found variants namely, B.1.1.7,  
 323 B.1.351, B.1.617 revealed that the variants B.1.351 and B.1.617 had the two highest binding  
 324 affinities respectively. Notably, the variant B.1.617 exhibited the highest docking score (**Table 3**).

325 **Table 3:** Results of Molecular Docking between SARS-CoV 2 Spike glycoprotein Receptor  
 326 Binding Domain (RBD) and human ACE2 receptor. The binding affinity was measured in  
 327 physiological temperature (37° C).

| Spike protein<br>variant ACE2 | TongDock_A<br>docking score | TongDock_A<br>Cluster size | Binding<br>affinity, ΔG<br>(kcal mol-1) | Kd (M) at<br>37.0 °C |
|-------------------------------|-----------------------------|----------------------------|-----------------------------------------|----------------------|
|                               |                             |                            |                                         |                      |

|           |          |    |       |         |
|-----------|----------|----|-------|---------|
| Reference | 1262.964 | 34 | -13.4 | 3.5E-10 |
| B 1.1.7   | 1293.348 | 36 | -12.8 | 1.0E-09 |
| B.1.351   | 1447.344 | 32 | -16.4 | 2.9E-12 |
| B.1.617   | 1541.675 | 39 | -16.2 | 3.5E-12 |

328

### 329 **3.8 Molecular Dynamic Simulation of the ACE2-Spike Protein**

#### 330 **Complex**

331 Protein backbone RMSD analysis of reference spike protein and the variants exhibited marked  
332 differences. The reference protein periodically showed large deviations until it attained stability at  
333 around 42 ns. The variant B.1.1.7 was much more stable. Despite some initial fluctuations it  
334 assumed stable conformation gradually after 20 ns. B.1.351 on the other hand was very stable since  
335 the beginning. However there were a number of spikes in between 34 and 40 ns after which the  
336 complex stabilized again. Among the four complexes tested, the one involving the variant B.1.617  
337 was the most stable of all. It remained highly stable throughout the simulation except there was a  
338 rise in RMSD at 36-46 ns period. However it maintained a steady value within this period as well  
339 **(Fig 9a).**

340 **Fig 9a: RMSD analysis of (I) Reference-ACE2 (II) B.1.1.7-ACE2 and (III) B.1.351-ACE2**  
341 **complex (IV) B.1.617-ACE2 complex.** The last one appeared to be most stable among all

342 Upon evaluation of the detailed residual atomic fluctuations through RMSF calculation of the  
343 protein C $\alpha$  atoms, it was apparent that both the reference and the variants B.1.351, and B.1.617  
344 were very similar in the sense that the atoms near the end of the complex were more flexible than  
345 the rest of the complex **(Fig 9b).**

346 **Fig 9b: RMSF values of (I) Reference-ACE2 (II) B.1.1.7-ACE2 and (III) B.1.351-ACE2**  
347 **complex (IV) B.1.617-ACE2 complex.** Except B.1.1.7, the rest of the variants showed very  
348 regional flexibility.

349 The Rg graphs revealed a very similar pattern found in the RMSD graphs. The variant B.1.617  
350 remained in compact state throughout the simulation with a period of unfolding at 36-46 ns. The  
351 reference protein unfolded at regular intervals and often to a high degree. The variant B.1.1.7  
352 folded steadily while B.1.351 unfolded abruptly several times from 34-40 ns and remained  
353 otherwise rest of the time (**Fig 9c**).

354 **Fig 9c: Rg measurement of (I) Reference-ACE2 (II) B.1.1.7-ACE2 and (III) B.1.351-ACE2**  
355 **complex (IV) B.1.617-ACE2 complex.** The B.1.617-ACE2 complex remained more compact  
356 than the rest.

357 SASA values provided a measure of the complex's susceptibility to disruption of their hydrophobic  
358 core by water . For all four complexes, the SASA declined gradually over time. However, the  
359 greatest reduction took place in the case of the variant B.1.617 (**Fig 9d**).

360 **Fig 9d: Solvent Accessibility Area calculation of (I) Reference-ACE2 (II) B.1.1.7-ACE2 and**  
361 **(III) B.1.351-ACE2 complex (IV) B.1.617-ACE2 complex.** Although solvent accessibility area  
362 gradually declined gradually for all 4 complex, the B.1.617-ACE2 complex lost solvent  
363 accessibility area the most.

## 364 **4. Discussion**

365 The first case of COVID-19 in Bangladesh was identified on migrants returning from Italy at the  
366 beginning of March (69). Since then, according to the official record (as of Jun 15, 2021) about

367 829K people have been affected and over 13K died of this virus in Bangladesh. Meanwhile, the  
368 virus has affected over 177 million individuals globally, with over 3.8 million deaths (1). Since  
369 the first patient had been identified, COVID-19 cases were found regularly in Bangladesh  
370 throughout the year 2020. The number of COVID-19 cases in neighboring India has been rising  
371 rapidly since March 2021. Inevitably, the number of SARS-CoV-2 cases in Bangladesh is also on  
372 the upswing. In this study, a comparative genomic analysis was performed to track the dynamics  
373 of SARS-CoV-2 evolution between the two waves of the COVID-19 pandemic in Bangladesh.

374 The rate of mutation in SARS-CoV-2 (~2 nucleotides/month) is far lower than that of influenza (4  
375 nucleotides/month) or HIV (8 nucleotides/month), yet its distinct genomic regions and proteins are  
376 mutating at significantly variable rates (70,71). The frequency of these mutations alters  
377 considerably depending on the geographical location with time as well. In this study, a significant  
378 rise in the rate of mutation was observed in wave-2 samples of Bangladesh compared to the wave-  
379 1. A similar pattern was observed in the instance of SARS-CoV-2 pandemic waves in Hiroshima,  
380 Japan (72). Although both waves in Bangladesh had a higher incidence of amino acid altering  
381 SNPs, wave-2 tended to have a higher number of deletion events (**Fig 3**). Such recurring recurrent  
382 deletion events in the SARS-CoV-2 genome had been reported to facilitate its transmission with  
383 altered antigenicity and antibody escape mechanism (73). Furthermore, despite the fact that C>T  
384 transitions prevailed in both waves, G>T transversion was rather frequent in wave-2 (**Fig 4**). This  
385 transversion provoked the G25563T nucleotide mutation event (ORF3a:Q57H in protein level) in  
386 the SARS-CoV-2 genome, which was a marker variant for GH clade (74). This might explain why  
387 the GH clade was observed to be more apparent in Bangladesh during Wave 2. Different marker  
388 variants for GISAID clades and lineages have been listed in **Table 1**. The phylogenetic clusters  
389 derived from the statistical distribution of SARS-CoV-2 genomic distances have been used to



390 define these clade classifications in GISAID (75).

391 **Table 1:** List of the Marker Variants for GISAID Clade and Lineage (76).

| <b>GISAID Clade</b> | <b>Lineage</b> | <b>Nucleotide Events</b>                                                       | <b>Protein Events</b>                                  |
|---------------------|----------------|--------------------------------------------------------------------------------|--------------------------------------------------------|
| S                   | A              | C8782T, T28144C                                                                | NS8:L84S                                               |
| L                   | B              | Reference Genome from Wuhan                                                    |                                                        |
| V                   | B.2            | G11083T, G26144T                                                               | NSP6:L37F,<br>NS3:G251V                                |
| G                   | B.1            | C241T, C3037T, A23403G                                                         | S:D614G                                                |
| GH                  | B.1.*          | C241T, C3037T, A23403G,<br>G25563T                                             | S:D614G,<br>ORF3a3:Q57H<br>[A17]                       |
| GR                  | B.1.1          | C241T, C3037T, A23403G,<br>G28882A                                             | S:D614G, N:G204R                                       |
| GV                  | B.1.177        | C241T, C3037T, A23403G,<br>C22227T                                             | S:D614G, S:A222V                                       |
| GRY                 | B.1.7          | C241T, C3037T, 21765-21770del,<br>21991-21993del, A23063T,<br>A23403G, G28882A | S:H69del, S:V70del,<br>S:Y144del,<br>S:N501Y, S:D614G, |

|  |  |  |         |
|--|--|--|---------|
|  |  |  | N:G204R |
|--|--|--|---------|

392

393 **Fig 3: Distribution of mutation classes between two waves of COVID-19 in Bangladesh.**

394 SNPs, silent SNPs, and extragenic mutations were similarly abundant in both waves. But,  
 395 sequences of wave-2 had a significant amount of deletion events.

396 **Fig 4: Most frequent mutational events per type between the two waves.** The C>T transition

397 was highly prevalent in both waves. While A>G transition is the second most abundant event in  
 398 wave-1, samples from wave-2 had G>T transversion event.

399 The second and third most common SNPs in Bangladesh were silent and extragenic SNPs,  
 400 respectively. Even though these SNPs do not alter the protein sequence directly, they have a major  
 401 impact on the efficiency of translation and transcription. SNPs in the 5'-UTR, in particular, can  
 402 influence the virus's transcription and replication processes by altering the folding of genomic  
 403 RNA (75). The A23403G, G3037T, C241T nucleotide variants as well as S: D614G,  
 404 ORF3a:Q57H, N:G204R protein variants were equally abundant in both waves (**Fig 6**). All of  
 405 these are marker variants for the G clade and its derivatives (**Table 1**), which explains why  
 406 Bangladesh experienced a greater distribution of these clades (**Fig 7**).

407 **Fig 6: Number of most frequent protein level alterations among two waves in Bangladesh.**

408 The four most frequent amino acid substituting events had the same type of distribution for both  
 409 waves. Besides, some mutations in spike and nucleocapsid protein (e.g., S:N501Y, N:T205I,  
 410 S:D80A ) were found in a significant amount in wave-2. Furthermore, the ORF3a:Q57H variant,  
 411 which is a marker variant for GH clade, was also very common in this case.

412 **Fig 7: Comparative distribution of different clades in two waves of COVID-19 pandemic in**  
 413 **Bangladesh.** G clade and its descendants dominated throughout the pandemic. But GR clade in  
 414 the case of wave-1 and GH clade in the case of wave-2 were the most prevalent ones. In the second  
 415 wave, the L, O, and S clades were almost completely lost.

416 In May 2021, the World Health Organization (WHO) recommended adopting Greek Alphabet  
 417 letters to name several important SARS-CoV-2 variants (**Table 2**). The most widely available  
 418 B.1.351.3 variant in wave-2 in Bangladesh is a sublineage of beta, a VOC variant first detected in  
 419 South African samples. On the other hand, the delta variant, which is driving a catastrophic  
 420 pandemic in neighboring country India, is the third most frequent variant in this wave in  
 421 Bangladesh (**Fig 8**).

422 **Table 2:** Naming SARS-CoV-2 variants by World Health Organization (WHO) (77)

| WHO Label | Lineage          | Variant Class | First Detected Samples      |
|-----------|------------------|---------------|-----------------------------|
| Alpha     | B.1.1.7          | VOC           | UK, Sep-2020                |
| Beta      | B.1.351          | VOC           | South Africa, May-2020      |
| Gamma     | P.1              | VOC           | Brazil, Nov-2020            |
| Delta     | B.1.617.2        | VOC           | India, Oct-2020             |
| Epsilon   | B.1.427, B.1.429 | VOI           | USA, Mar-2020               |
| Zeta      | P.2              | VOI           | Brazil, Apr-2020            |
| Eta       | B.1.525          | VOI           | Several Countries, Dec-2020 |

|       |           |     |                       |
|-------|-----------|-----|-----------------------|
| Theta | P.3       | VOI | Philippines, Jan-2021 |
| Iota  | B.1.526   | VOI | USA, Nov-2020         |
| Kappa | B.1.617.1 | VOI | India, Oct-2020       |

423

424 **Fig 8: Prevalence of different variants (in percentage) observed in wave-1 and 2 of COVID-**  
425 **19 pandemic in Bangladesh.** Almost all SARS-CoV-2 variants of wave-1 were from B lineage.  
426 On the other hand, wave-2 had an increased number of VOC variants. The most prevalent  
427 B.1.351.3 variant of this wave is a derivative of the beta (B.1.351) variant.

428 The importance of the interaction between the ACE2 receptor and the SARS-CoV-2 spike protein  
429 is paramount in understanding the pathogenesis of COVID-19 infection (78). Molecular docking  
430 and dynamics simulations are one of the key tools for getting in-depth insights into these  
431 interactions (79–81).

432 Molecular docking experiment showed that the Spike protein of the variants B.1.351 and B.1.617  
433 bound most tightly to the ACE2 receptor. From the 50 ns molecular dynamics simulation carried  
434 out in GROMACS, the complex between the ACE2 receptor and the Spike protein variant of  
435 B.1.617 was found to be most stable considering its structural deviation, local area flexibility, state  
436 of folding, and susceptibility to disruption by solvents (**Fig 9**). These findings coincide with those  
437 reported in other studies and the enhanced Spike protein stability of the B.1.617 is likely to  
438 contribute to the efficiency of transmission of SARS-CoV-2 (82–84).

439 **Fig 9a: RMSD analysis of (I) Reference-ACE2 (II) B.1.1.7-ACE2 and (III) B.1.351-ACE2**  
440 **complex (IV) B.1.617-ACE2 complex.** The last one appeared to be most stable among all.

441 **Fig 9b: RMSF values of (I) Reference-ACE2 (II) B.1.1.7-ACE2 and (III) B.1.351-ACE2**  
442 **complex (IV) B.1.617-ACE2 complex.** Except B.1.1.7, the rest of the variants showed very  
443 regional flexibility.

444 **Fig 9c: Rg measurement of (I) Reference-ACE2 (II) B.1.1.7-ACE2 and (III) B.1.351-ACE2**  
445 **complex (IV) B.1.617-ACE2 complex.** The B.1.617-ACE2 complex remained more compact  
446 than the rest.

447 **Fig 9d: Solvent Accessibility Area calculation of (I) Reference-ACE2 (II) B.1.1.7-ACE2 and**  
448 **(III) B.1.351-ACE2 complex (IV) B.1.617-ACE2 complex.** Although solvent accessibility area  
449 gradually declined gradually for all 4 complex, the B.1.617-ACE2 complex lost solvent  
450 accessibility area the most.

## 451 **5. Conclusions**

452 The current study revealed significant genomic and proteomic differences in the SARS-CoV-2  
453 viral isolates circulating within the perimeters of Bangladesh between the first and the second wave  
454 of the COVID-19 pandemic. They differ in terms of distribution of clades, mutations, variants, rate  
455 of mutations, and even in terms of their interactions with the host ACE2 receptor. The study found  
456 evidence that the B.1.617 lineage of the virus is likely to be more infectious than others. Notably,  
457 any existence of a domestic variant is yet to be detected. Therefore, if Bangladesh can shield itself  
458 from the arrival of SARS-CoV-2 variants from outside for a substantial period, the COVID-19  
459 pandemic in the country is likely to come to an end.

## 460 **Acknowledgements**

461 This research work did not receive any funding.

## 462 **References**

- 463 1. Coronavirus Graphs: Worldwide Cases and Deaths - Worldometer [Internet]. [cited 2021  
464 Jun 15]. Available from: <https://www.worldometers.info/coronavirus/worldwide-graphs/>
- 465 2. SL K, A M, A M, SM L. The Threat of Pandemic Influenza. The Threat of Pandemic  
466 Influenza. National Academies Press; 2005.
- 467 3. Muscatello DJ, McIntyre PB. Comparing mortalities of the first wave of coronavirus disease  
468 2019 (COVID-19) and of the 1918–19 winter pandemic influenza wave in the USA. *Int J*  
469 *Epidemiol.* 2020 Sep;
- 470 4. Hasanul Banna Siam M, Mahbub Hasan M, Raheem E, Hasinur Rahaman Khan M, Siddiquee  
471 MH, Sorowar Hossain M. Insights into the first wave of the COVID-19 pandemic in  
472 Bangladesh: Lessons learned from a high-risk country. *medRxiv.*  
473 1101;2020.08.05.20168674.
- 474 5. Salzberger B, Buder F, Lampl B, Ehrenstein B, Hitzenbichler F, Holzmann T, et al.  
475 Epidemiology of SARS-CoV-2. *Infection* [Internet]. 2020 Oct 8 [cited 2020 Dec 4];  
476 Available from: <https://pubmed.ncbi.nlm.nih.gov/33034020/>
- 477 6. Moore G, Rickard H, Stevenson D, Bou PA, Pitman J, Crook A, et al. Detection of SARS-  
478 CoV-2 within the healthcare environment: A multicentre study conducted during the first  
479 wave of the COVID-19 outbreak in England. *J Hosp Infect.* 2020  
480 Sep;2020.09.24.20191411.
- 481 7. 24. Ryu S, Ali ST, Noh E, Kim D, Lau EHY, Cowling BJ. Transmission dynamics and  
482 control of two epidemic waves of SARS-CoV-2 in South Korea. *BMC Infectious Diseases.*

- 483 2021 May 26;21(1).
- 484 8. Grubaugh ND, Ladner JT, Kraemer MUG, Dudas G, Tan AL, Gangavarapu K, et al.  
485 Genomic epidemiology reveals multiple introductions of Zika virus into the United States.  
486 Nature. 2017 Jun;546(7658):401–5.
- 487 9. Ladner JT, Grubaugh ND, Pybus OG, Andersen KG. Precision epidemiology for infectious  
488 disease control. Vol. 25, Nature Medicine. Nature Publishing Group; 2019. p. 206–11.
- 489 10. Kalinich CC, Jensen CG, Neugebauer P, Petrone ME, Peña-Hernández M, Ott IM, et al.  
490 Real-time public health communication of local SARS-CoV-2 genomic epidemiology.  
491 PLOS Biology. 2020 Aug 21;18(8):e3000869.
- 492 11. Deng X, Gu W, Federman S, du Plessis L, Pybus OG, Faria NR, et al. Genomic surveillance  
493 reveals multiple introductions of SARS-CoV-2 into Northern California.
- 494 12. Meredith LW, Hamilton WL, Warne B, Houldcroft CJ, Hosmillo M, Jahun AS, et al. Rapid  
495 implementation of SARS-CoV-2 sequencing to investigate cases of health-care associated  
496 COVID-19: a prospective genomic surveillance study. Lancet Infect Dis. 2020 Nov  
497 1;20(11):1263–72.
- 498 13. An integrated national scale SARS-CoV-2 genomic surveillance network. The Lancet  
499 Microbe. 2020 Jul;1(3):e99–100.
- 500 14. Resende PC, Delatorre E, Gräf T, Mir D, Motta F do C, Appolinario LR, et al. Genomic  
501 surveillance of SARS-CoV-2 reveals community transmission of a major lineage during the  
502 early pandemic phase in Brazil. bioRxiv. 2020 Jun;2020.06.17.158006.
- 503 15. Morens DM, Breman JG, Calisher CH, Doherty PC, Hahn BH, Keusch GT, et al. The Origin

504 of COVID-19 and Why It Matters. *The American Journal of Tropical Medicine and*  
505 *Hygiene*. 2020 Jul 22;103(3).

506 16. Bolsen T, Palm R, Kingsland JT. Framing the Origins of COVID-19. *Science*  
507 *Communication* [Internet]. 2020 Sep 10; Available from:  
508 <https://www.ncbi.nlm.nih.gov/pmc/articles/PMC7484600/>

509 17. Burki T. The origin of SARS-CoV-2. *The Lancet Infectious Diseases*. 2020  
510 Sep;20(9):1018–9.

511 18. Zhou P, Yang X Lou, Wang XG, Hu B, Zhang L, Zhang W, et al. A pneumonia outbreak  
512 associated with a new coronavirus of probable bat origin. *Nature*. 2020 Mar;579(7798):270–  
513 3.

514 19. Khailany RA, Safdar M, Ozaslan M. Genomic characterization of a novel SARS-CoV-2.  
515 *Gene Reports*. 2020 Jun 1;19:100682.

516 20. Naqvi AAT, Fatima K, Mohammad T, Fatima U, Singh IK, Singh A, et al. Insights into  
517 SARS-CoV-2 genome, structure, evolution, pathogenesis and therapies: Structural  
518 genomics approach. Vol. 1866, *Biochimica et Biophysica Acta - Molecular Basis of*  
519 *Disease*. Elsevier B.V.; 2020. p. 165878.

520 21. Payne S. Family Coronaviridae. In: *Viruses*. Elsevier; 2017. p. 149–58.

521 22. Hossain MU, Bhattacharjee A, Emon MTH, Chowdhury ZM, Mosaib MG, Mourin M, et  
522 al. Recognition of plausible therapeutic agents to combat COVID-19: An omics data based  
523 combined approach. *Gene*. 2021 Mar;771.

524 23. Chang C, Sue S-C, Yu T, Hsieh C-M, Tsai C-K, Chiang Y-C, et al. Modular organization



- 525 of SARS coronavirus nucleocapsid protein. *Journal of Biomedical Science* [Internet]. 2005  
526 Oct 14 [cited 2020 Sep 30];13(1):59–72. Available from:  
527 <https://www.ncbi.nlm.nih.gov/pmc/articles/PMC7089556/>
- 528 24. Chen N, Zhou M, Dong X, Qu J, Gong F, Han Y, et al. Epidemiological and clinical  
529 characteristics of 99 cases of 2019 novel coronavirus pneumonia in Wuhan, China: a  
530 descriptive study. *Lancet*. 2020 Feb 15;395(10223):507–13.
- 531 25. Woo PCY, Lau SKP, Lam CSF, Lau CCY, Tsang AKL, Lau JHN, et al. Discovery of Seven  
532 Novel Mammalian and Avian Coronaviruses in the Genus Deltacoronavirus Supports Bat  
533 Coronaviruses as the Gene Source of Alphacoronavirus and Betacoronavirus and Avian  
534 Coronaviruses as the Gene Source of Gammacoronavirus and Deltacoronavirus. *J Virol*.  
535 2012 Apr 1;86(7):3995–4008.
- 536 26. Lam TTY, Jia N, Zhang YW, Shum MHH, Jiang JF, Zhu HC, et al. Identifying SARS-CoV-  
537 2-related coronaviruses in Malayan pangolins. *Nature*. 2020;583(7815).
- 538 27. Hong B, Lai X, Chen Y, Luo T, An X, Song L, et al. SARS-CoV-2 and Malayan pangolin  
539 coronavirus infect human endoderm, ectoderm and induced lung progenitor cells. *bioRxiv*  
540 [Internet]. 2020 Sep 25 [cited 2020 Nov 19];2020.09.25.313270. Available from:  
541 <https://doi.org/10.1101/2020.09.25.313270>
- 542 28. Zhang T, Wu Q, Zhang Z. Probable Pangolin Origin of SARS-CoV-2 Associated with the  
543 COVID-19 Outbreak. *Curr Biol*. 2020 Apr 6;30(7):1346-1351.e2.
- 544 29. Han GZ. Pangolins Harbor SARS-CoV-2-Related Coronaviruses. Vol. 28, *Trends in*  
545 *Microbiology*. Elsevier Ltd; 2020. p. 515–7.

- 546 30. Xiao K, Zhai J, Feng Y, Zhou N, Zhang X, Zou J-J, et al. Isolation of SARS-CoV-2-related  
547 coronavirus from Malayan pangolins. *Nature* [Internet]. 2020 May 7 [cited 2020 May  
548 10];1–7. Available from: <https://www.nature.com/articles/s41586-020-2313-x>
- 549 31. Adhikari SP, Meng S, Wu YJ, Mao YP, Ye RX, Wang QZ, et al. Epidemiology, causes,  
550 clinical manifestation and diagnosis, prevention and control of coronavirus disease  
551 (COVID-19) during the early outbreak period: A scoping review. Vol. 9, *Infectious  
552 Diseases of Poverty*. BioMed Central Ltd.; 2020. p. 1–12.
- 553 32. Böhmer MM, Buchholz U, Corman VM, Hoch M, Katz K, Marosevic D V., et al.  
554 Investigation of a COVID-19 outbreak in Germany resulting from a single travel-associated  
555 primary case: a case series. *Lancet Infect Dis*. 2020 Aug;20(8):920–8.
- 556 33. Grasso M, Klicperová-Baker M, Koos S, Kosyakova Y, Petrillo A, Vlase I. The impact of  
557 the coronavirus crisis on European societies. What have we learnt and where do we go from  
558 here? – Introduction to the COVID volume. *European Societies*. 2021 Jan 27;23(sup1):S2–  
559 32.
- 560 34. Salimi A, ElHawary H, Diab N, Smith L. The North American Layman’s Understanding of  
561 COVID-19: Are We Doing Enough? *Frontiers in Public Health*. 2020 Jul 3;8.
- 562 35. Barai MK. COVID 19 in South Asia and the Way Forward: An Introduction. *South Asian  
563 Survey*. 2021 Mar;28(1):7–19.
- 564 36. Martini M, Gazzaniga V, Bragazzi NL, Barberis I. The Spanish Influenza Pandemic: A  
565 lesson from history 100 years after 1918. *J Prev Med Hyg*. 2019;60(1):E64–7.
- 566 37. James N, Menzies M, Radchenko P. COVID-19 second wave mortality in Europe and the

- 567 United States. *Chaos: An Interdisciplinary Journal of Nonlinear Science*. 2021  
568 Mar;31(3):031105.
- 569 38. de Souza FSH, Hojo-Souza NS, da Silva CM, Guidoni DL. Second wave of COVID-19 in  
570 Brazil: younger at higher risk. *European Journal of Epidemiology* [Internet]. 2021 Apr 21  
571 [cited 2021 Jun 17];1–3. Available from:  
572 <https://www.ncbi.nlm.nih.gov/pmc/articles/PMC8058142/>
- 573 39. Post LA, Lin JS, Moss CB, Murphy RL, Ison MG, Achenbach CJ, et al. SARS-CoV-2 Wave  
574 Two Surveillance in East Asia and the Pacific: Longitudinal Trend Analysis. *Journal of*  
575 *Medical Internet Research*. 2021 Feb 1;23(2):e25454.
- 576 40. Menon V, Kar SK, Ransing R, Arafat SMY. Impending Second Wave of COVID-19  
577 Infections: What India Needs to Do? *Asia Pacific Journal of Public Health*. 2021 Mar  
578 5;101053952199886.
- 579 41. Robinson J, Banerjee I, Leclézio A, Sathian B. COVID-19 and mutations a threat level  
580 assessment. *Nepal J Epidemiol*. 2021 Mar;11(1):983–7.
- 581 42. Zhou W, Wang W. Fast-spreading SARS-CoV-2 variants: challenges to and new design  
582 strategies of COVID-19 vaccines. *Signal Transduct Target Ther*. 2021 Dec;6(1):226.
- 583 43. Davies NG, Jarvis CI, van Zandvoort K, Clifford S, Sun FY, Funk S, et al. Increased  
584 mortality in community-tested cases of SARS-CoV-2 lineage B.1.1.7. *Nature* [Internet].  
585 2021 May 13 [cited 2021 Jun 15];593(7858):270–4. Available from:  
586 <https://doi.org/10.1038/s41586-021-03426-1>
- 587 44. Zhou D, Dejnirattisai W, Supasa P, Liu C, Mentzer AJ, Ginn HM, et al. Evidence of escape

588 of SARS-CoV-2 variant B.1.351 from natural and vaccine-induced sera. *Cell*. 2021 Feb;

589 45. Sabino EC, Buss LF, Carvalho MPS, Prete CA, Crispim MAE, Fraiji NA, et al. Resurgence  
590 of COVID-19 in Manaus, Brazil, despite high seroprevalence. *The Lancet* [Internet]. 2021  
591 Jan 27 [cited 2021 Feb 3];0(0). Available from:  
592 [https://www.thelancet.com/journals/lancet/article/PIIS0140-6736\(21\)00183-5/fulltext](https://www.thelancet.com/journals/lancet/article/PIIS0140-6736(21)00183-5/fulltext)

593 46. McCallum M, Bassi J, Marco A De, Chen A, Walls AC, Iulio J Di, et al. SARS-CoV-2  
594 immune evasion by variant B.1.427/B.1.429. *bioRxiv Prepr Serv Biol*. 2021 Apr;

595 47. Adam D. What scientists know about new, fast-spreading coronavirus variants. *Nature*.  
596 2021 Jun;594(7861):19–20.

597 48. Tegally H, Wilkinson E, Giovanetti M, Iranzadeh A, Fonseca V, Giandhari J, et al.  
598 Emergence and rapid spread of a new severe acute respiratory syndrome-related coronavirus  
599 2 (SARS-CoV-2) lineage with multiple spike mutations in South Africa [Internet]. Vol. 10,  
600 medRxiv. Constantinos; 2020 [cited 2021 Jun 15]. p. 2020.12.21.20248640. Available  
601 from: <https://doi.org/10.1101/2020.12.21.20248640>

602 49. Harvey WT, Carabelli AM, Jackson B, Gupta RK, Thomson EC, Harrison EM, et al. SARS-  
603 CoV-2 variants, spike mutations and immune escape. *Nat Rev Microbiol*. 2021  
604 Jun;19(7):409–24.

605 50. 7. Hirotsu Y, Omata M. Discovery of a SARS-CoV-2 variant from the P.1 lineage harboring  
606 K417T/E484K/N501Y mutations in Kofu, Japan. *Journal of Infection* [Internet]. 2021 Jun  
607 1 [cited 2021 Jun 17];82(6):276–316. Available from:  
608 [https://www.journalofinfection.com/article/S0163-4453\(21\)00130-4/fulltext](https://www.journalofinfection.com/article/S0163-4453(21)00130-4/fulltext)

- 609 51. Wall EC, Wu M, Harvey R, Kelly G, Warchal S, Sawyer C, et al. Neutralising antibody  
610 activity against SARS-CoV-2 VOCs B.1.617.2 and B.1.351 by BNT162b2 vaccination. The  
611 Lancet [Internet]. 2021 Jun 3 [cited 2021 Jun 17];0(0). Available from:  
612 [https://www.thelancet.com/journals/lancet/article/PIIS0140-6736\(21\)01290-3/fulltext](https://www.thelancet.com/journals/lancet/article/PIIS0140-6736(21)01290-3/fulltext)
- 613 52. Cherian S, Potdar V, Jadhav S, Yadav P, Gupta N, Das M, et al. Convergent evolution of  
614 SARS-CoV-2 spike mutations, L452R, E484Q and P681R, in the second wave of COVID-  
615 19 in Maharashtra, India. bioRxiv [Internet]. 2021 May 3 [cited 2021 Jun  
616 15];2021.04.22.440932. Available from: <https://doi.org/10.1101/2021.04.22.440932>
- 617 53. Zhou H, Dcosta BM, Samanovic MI, Mulligan MJ, Landau NR. The Spike Proteins of  
618 SARS-CoV-2 B.1.617 and B.1.618 Variants Identified in India 1 Provide Partial Resistance  
619 to Vaccine-elicited and Therapeutic Monoclonal 2 Antibodies. 3 4 Takuya Tada. bioRxiv  
620 [Internet]. 2021 May 16 [cited 2021 Jun 15];2021.05.14.444076. Available from:  
621 <https://doi.org/10.1101/2021.05.14.444076>
- 622 54. Anwar S, Nasrullah M, Hosen MJ. COVID-19 and Bangladesh: Challenges and How to  
623 Address Them. *Front Public Heal.* 2020 Apr;8:154.
- 624 55. Kabir H, Maple M, Usher K. The impact of COVID-19 on Bangladeshi readymade garment  
625 (RMG) workers. *J Public Health (Oxf).* 2021 Apr;43(1):47–52.
- 626 56. Bangladesh: WHO Coronavirus Disease (COVID-19) Dashboard With Vaccination Data |  
627 WHO Coronavirus (COVID-19) Dashboard With Vaccination Data [Internet]. [cited 2021  
628 Jun 15]. Available from: <https://covid19.who.int/region/searo/country/bd>
- 629 57. Saha S, Malaker R, Sajib MSI, Hasanuzzaman M, Rahman H, Ahmed ZB, et al. Complete  
630 Genome Sequence of a Novel Coronavirus (SARS-CoV-2) Isolate from Bangladesh.

631 Microbiol Resour Announc. 2020 Jun;9(24).

632 58. Moniruzzaman M, Hossain MU, Islam MN, Rahman MH, Ahmed I, Rahman TA, et al.  
633 Coding-Complete Genome Sequence of SARS-CoV-2 Isolate from Bangladesh by Sanger  
634 Sequencing. Microbiol Resour Announc. 2020 Jul;9(28).

635 59. Elbe S, Buckland-Merrett G. Data, disease and diplomacy: GISAID's innovative  
636 contribution to global health. Glob Challenges. 2017 Jan;1(1):33–46.

637 60. Wu F, Zhao S, Yu B, Chen YM, Wang W, Song ZG, et al. A new coronavirus associated  
638 with human respiratory disease in China. Nature. 2020;579(7798):265–9.

639 61. 5. Mercatelli D, Giorgi FM. Geographic and Genomic Distribution of SARS-CoV-2  
640 Mutations. Frontiers in Microbiology. 2020 Jul 22;11.

641 62. Delcher AL, Phillippy A, Carlton J, Salzberg SL. Fast algorithms for large-scale genome  
642 alignment and comparison. Nucleic Acids Res. 2002 Jun;30(11):2478–83.

643 63. 4. Villanueva RAM, Chen ZJ. ggplot2: Elegant Graphics for Data Analysis (2nd ed.).  
644 Measurement: Interdisciplinary Research and Perspectives. 2019 Jul 3;17(3):160–7.

645 64. 3. Kim DE, Chivian D, Baker D. Protein structure prediction and analysis using the Robetta  
646 server. Nucleic Acids Research. 2004 Jul 1;32(Web Server):W526–31.

647 65. Park T, Baek M, Lee H, Seok C. GalaxyTongDock: Symmetric and asymmetric  
648 ab initio protein–protein docking web server with improved energy parameters. Journal of  
649 Computational Chemistry. 2019 Jun 7;40(27):2413–7.

650 66. 1. Xue LC, Rodrigues JP, Kastitis PL, Bonvin AM, Vangone A. PRODIGY: a web server  
651 for predicting the binding affinity of protein–protein complexes. Bioinformatics. 2016 Aug

- 652 8.
- 653 67. Abraham MJ, Murtola T, Schulz R, Páll S, Smith JC, Hess B, et al. Gromacs: High  
654 performance molecular simulations through multi-level parallelism from laptops to  
655 supercomputers. *SoftwareX*. 2015 Sep 1;1-2:19-25.
- 656 68. Schuler LD, Daura X, Van Gunsteren WF. An Improved GROMOS96 Force Field for  
657 Aliphatic Hydrocarbons in the Condensed Phase. Vol. 22, *Journal of Computational*  
658 *Chemistry*. 2001.
- 659 69. Islam MT, Talukder AK, Siddiqui MN, Islam T. Tackling the COVID-19 pandemic: The  
660 Bangladesh perspective. *J Public health Res*. 2020;9(4):389-97.
- 661 70. Callaway E. The coronavirus is mutating - does it matter? Vol. 585, *Nature*. NLM  
662 (Medline); 2020. p. 174-7.
- 663 71. Vilar S, Isom DG. One year of SARS-CoV-2: How much has the virus changed? *Biology*  
664 (Basel). 2021 Feb;10(2):1-18.
- 665 72. Ko K, Nagashima S, Bunthen E, Ouoba S, Akita T, Sugiyama A, et al. Molecular  
666 characterization and the mutation pattern of SARS-CoV-2 during first and second wave  
667 outbreaks in Hiroshima, Japan. *PLoS One*. 2021 Feb;16(2 February):e0246383.
- 668 73. McCarthy KR, Rennick LJ, Nambulli S, Robinson-McCarthy LR, Bain WG, Haidar G, et  
669 al. Recurrent deletions in the SARS-CoV-2 spike glycoprotein drive antibody escape.  
670 *Science (80- )*. 2021 Mar;371(6534):1139-42.
- 671 74. GISAID - Clade and lineage nomenclature aids in genomic epidemiology of active hCoV-  
672 19 viruses.

- 673 75. Han AX, Parker E, Scholer F, Maurer-Stroh S, Russell CA. Phylogenetic clustering by  
674 linear integer programming (PhyCLiP). *Mol Biol Evol.* 2019 Jul;36(7):1580–95.
- 675 76. Rambaut A, Holmes EC, O’Toole Á, Hill V, McCrone JT, Ruis C, et al. A dynamic  
676 nomenclature proposal for SARS-CoV-2 lineages to assist genomic epidemiology. *Nat*  
677 *Microbiol.* 2020 Nov 1;5(11):1403–7.
- 678 77. Tracking SARS-CoV-2 variants [Internet]. [cited 2021 Jun 15]. Available from:  
679 <https://www.who.int/en/activities/tracking-SARS-CoV-2-variants/>
- 680 78. Wang Q, Zhang Y, Wu L, Niu S, Song C, Zhang Z, et al. Structural and Functional Basis  
681 of SARS-CoV-2 Entry by Using Human ACE2. *Cell.* 2020 May;181(4):894-904.e9.
- 682 79. Arantes PR, Saha A, Palermo G. Fighting covid-19 using molecular dynamics simulations.  
683 *ACS Cent Sci.* 2020 Oct;6(10):1654–6.
- 684 80. Martí D, Torras J, Bertran O, Turon P, Alemán C. Temperature effect on the SARS-CoV-  
685 2: A molecular dynamics study of the spike homotrimeric glycoprotein. *Comput Struct*  
686 *Biotechnol J.* 2021 Jan;19:1848–62.
- 687 81. Sixto-López Y, Correa-Basurto J, Bello M, Landeros-Rivera B, Garzón-Tiznado JA,  
688 Montañó S. Structural insights into SARS-CoV-2 spike protein and its natural mutants  
689 found in Mexican population. *Sci Rep.* 2021 Dec;11(1):4659.
- 690 82. Lon JR, Xi B, Zhong B, Zheng Y, Guo P, Chen Z, et al. Molecular dynamics simulation  
691 study of effects of key mutations in SARS-CoV-2 on protein structures.
- 692 83. Wu S, Tian C, Liu P, Guo D, Zheng W, Huang X, et al. Effects of SARS-CoV-2 mutations  
693 on protein structures and intraviral protein–protein interactions. *J Med Virol.* 2021



694 Apr;93(4):2132–40.

695 84. Korber B, Fischer WM, Gnanakaran S, Yoon H, Theiler J, Abfalterer W, et al. Tracking  
696 Changes in SARS-CoV-2 Spike: Evidence that D614G Increases Infectivity of the COVID-  
697 19 Virus. Cell. 2020 Aug 20;182(4):812-827.e19.

698

699 **Supplementary Information**

700 **Supplementary File 1. Sample\_info\_of\_wave-1**

701 **Supplementary File 2. Sample\_info\_of\_wave-2**

702 **Supplementary File 3. ref\_annot**

703 **Supplementary File 4. full\_report**

704 **Supplementary File 5. mutation\_number\_in\_samples**

705 **Supplementary File 6. mutation\_classes**

706 **Supplementary File 7. variant\_types**

707 **Supplementary File 8. nucleotide\_events**

708 **Supplementary File 9. protein\_events**

709 **Supplementary File 10. variant\_and\_clades\_distribution**

710

711

712

713 **Fig 1**

714

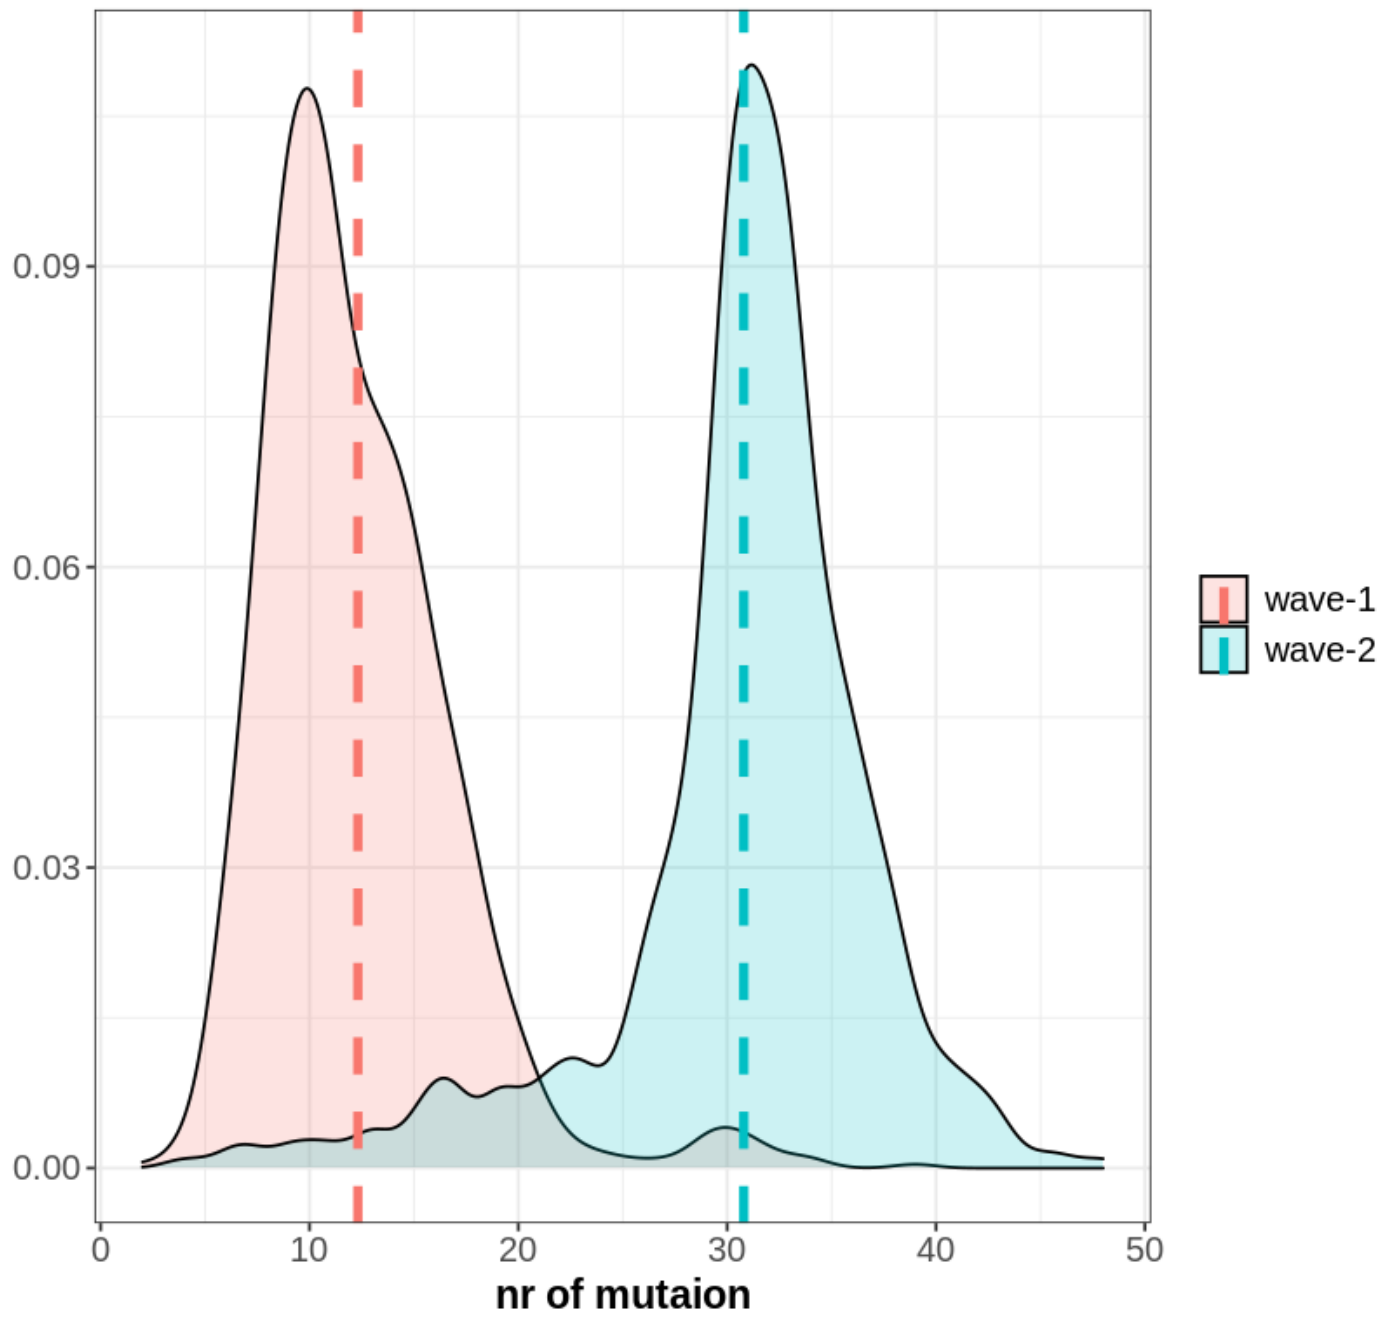

715

716

717

718

719

720 **Fig 2**

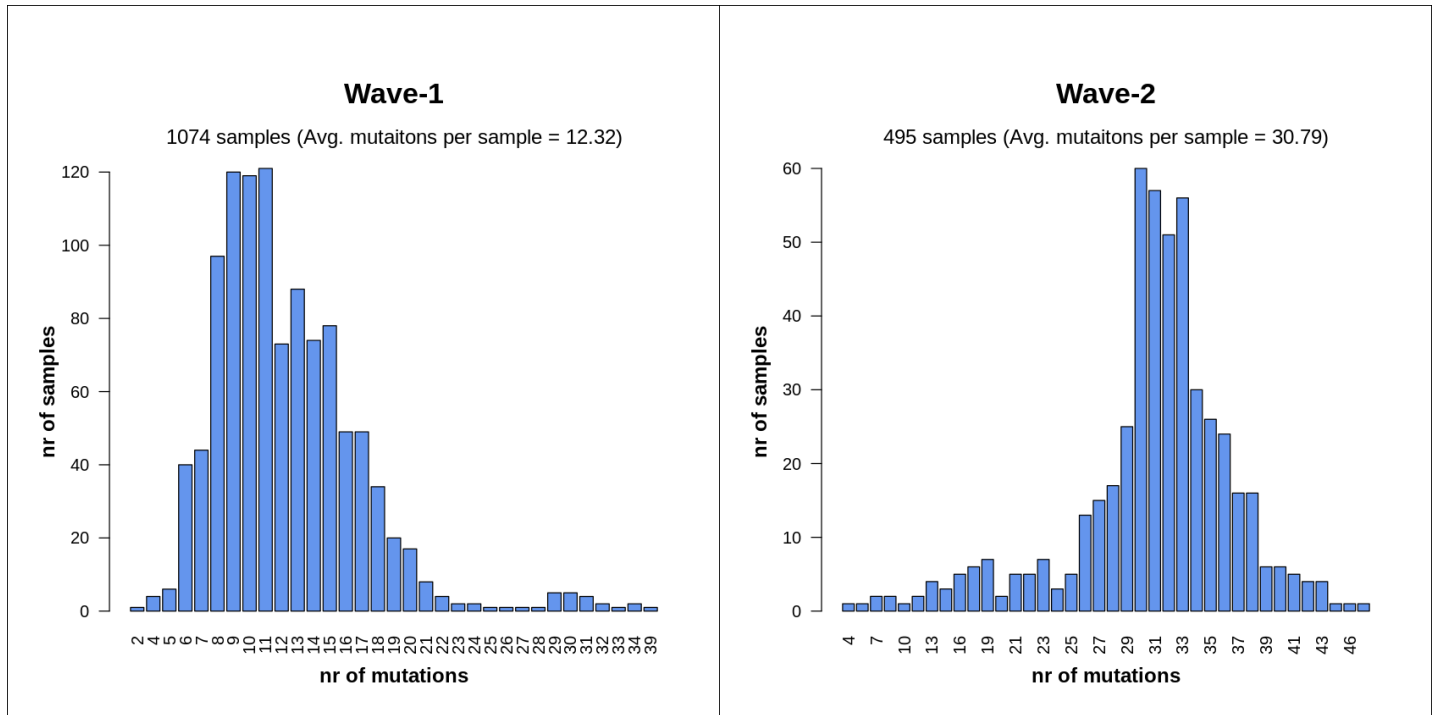

721

722

723 **Fig 3**

724

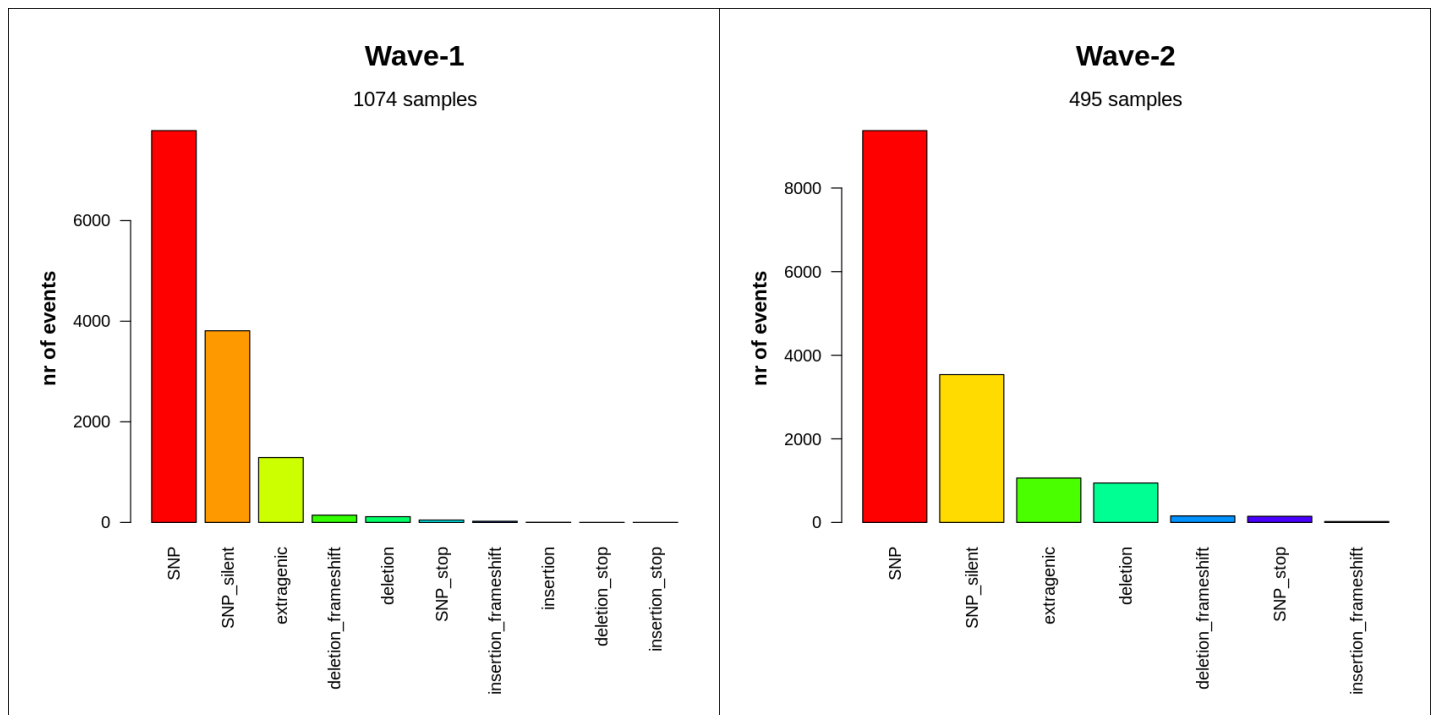

725 **Fig 4**

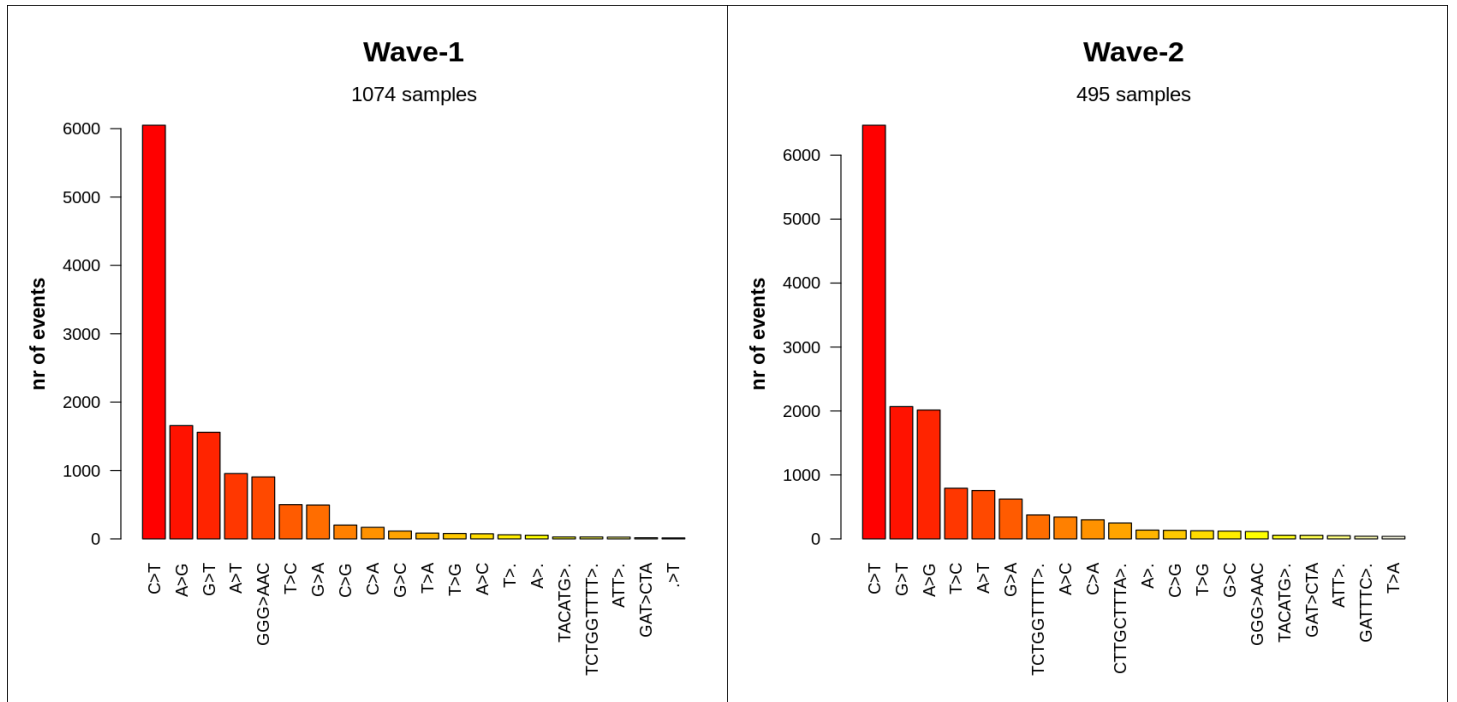

726 **Fig 5**

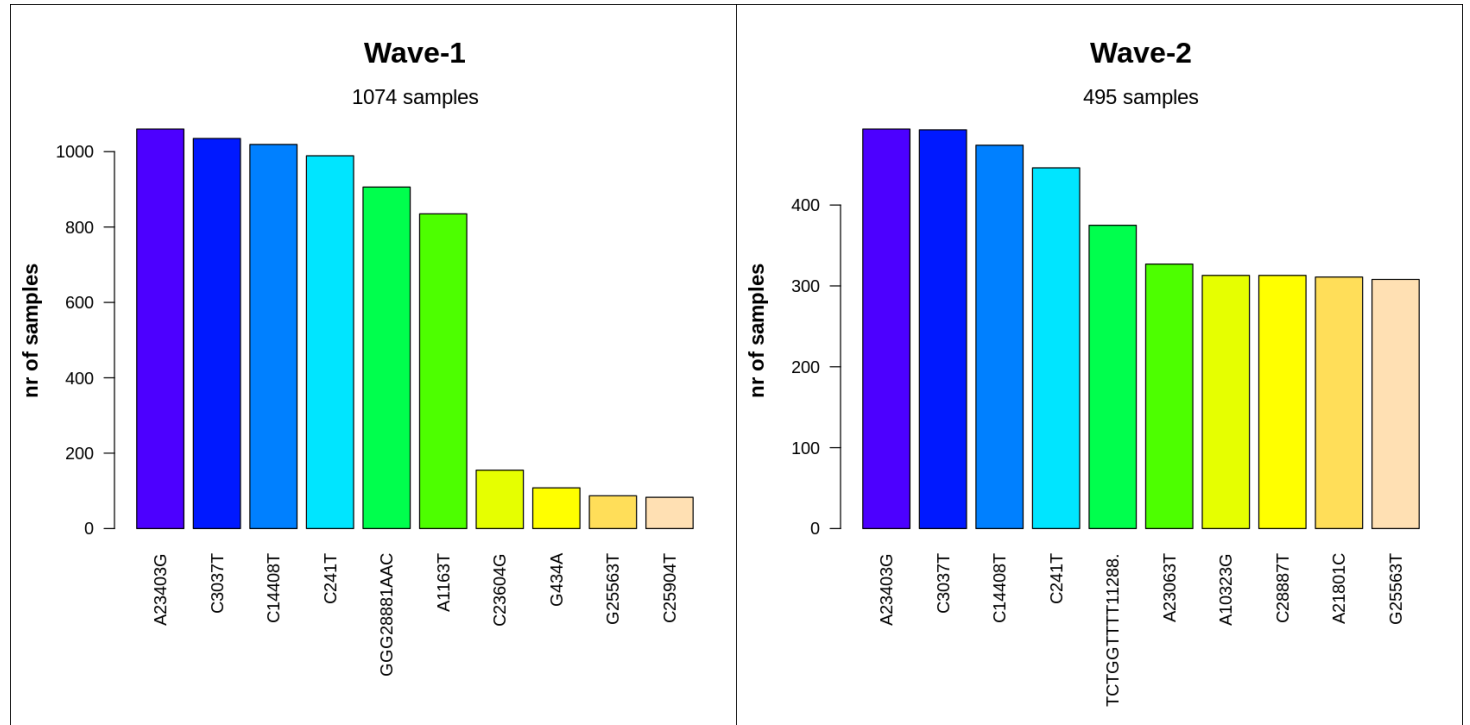

727

728 **Fig 6**

729

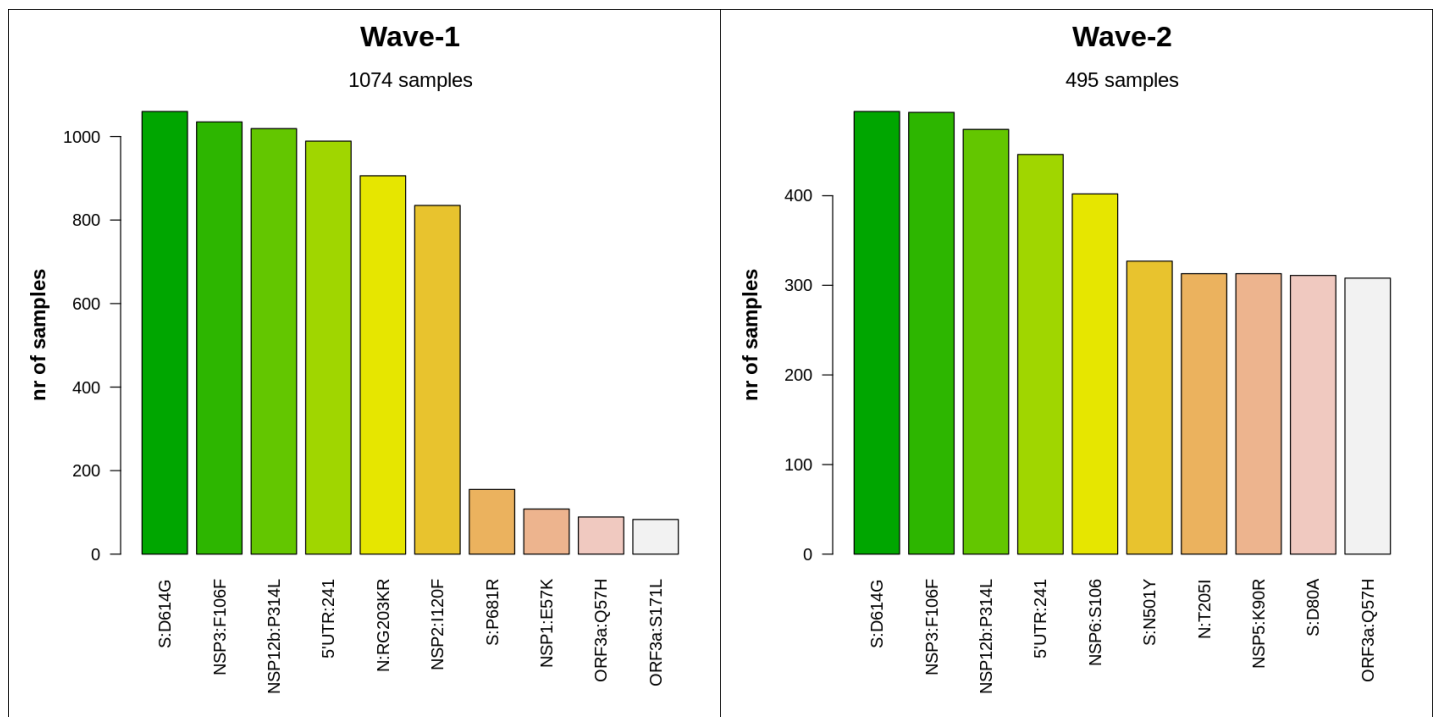

730

731

732

733

734

735

736

737

738

739

740

741

742

743

744 **Fig 7**

745

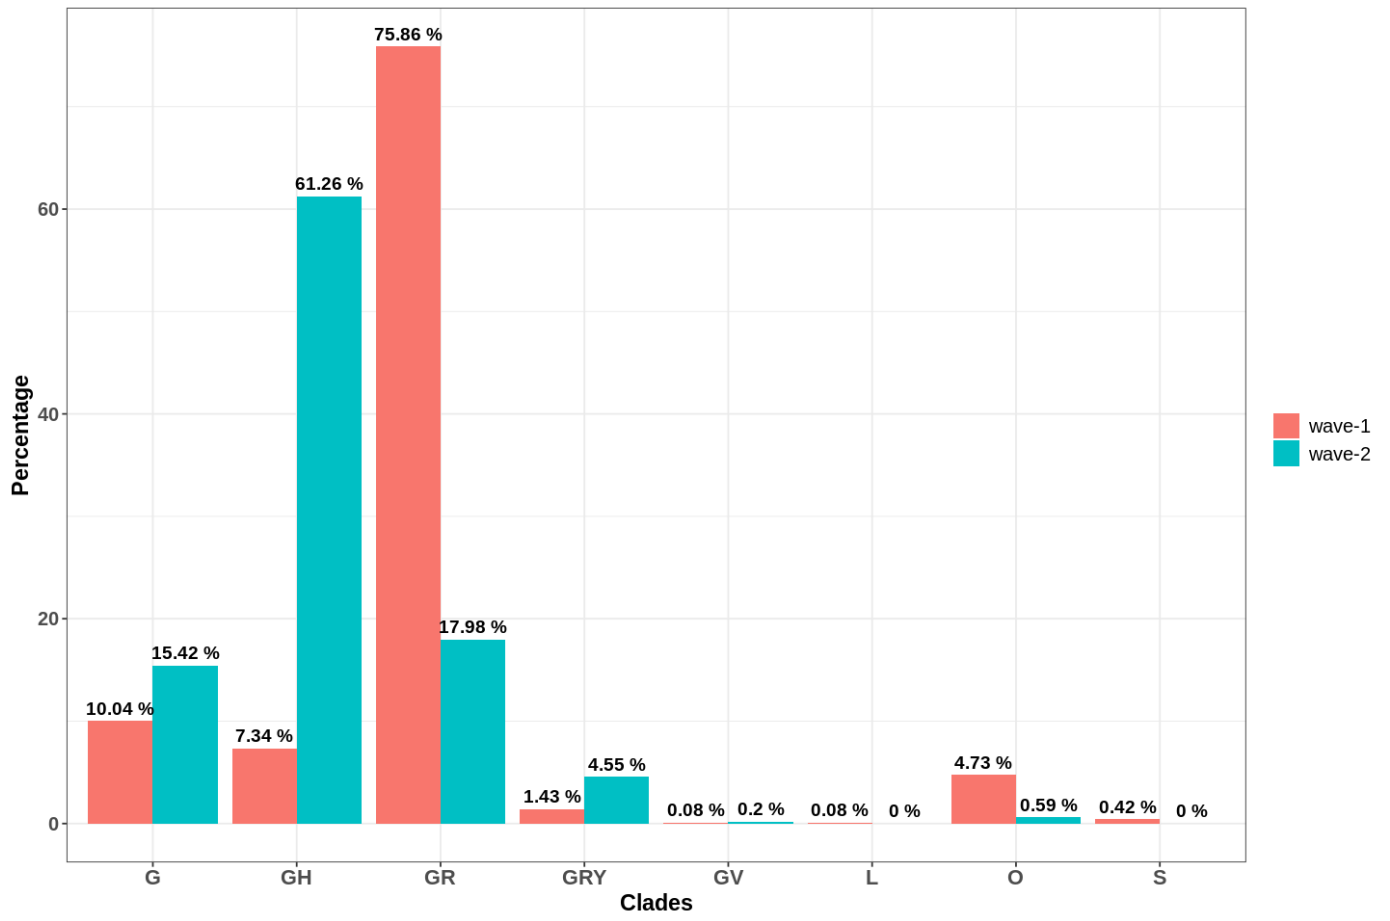

746

747 **Fig 8**

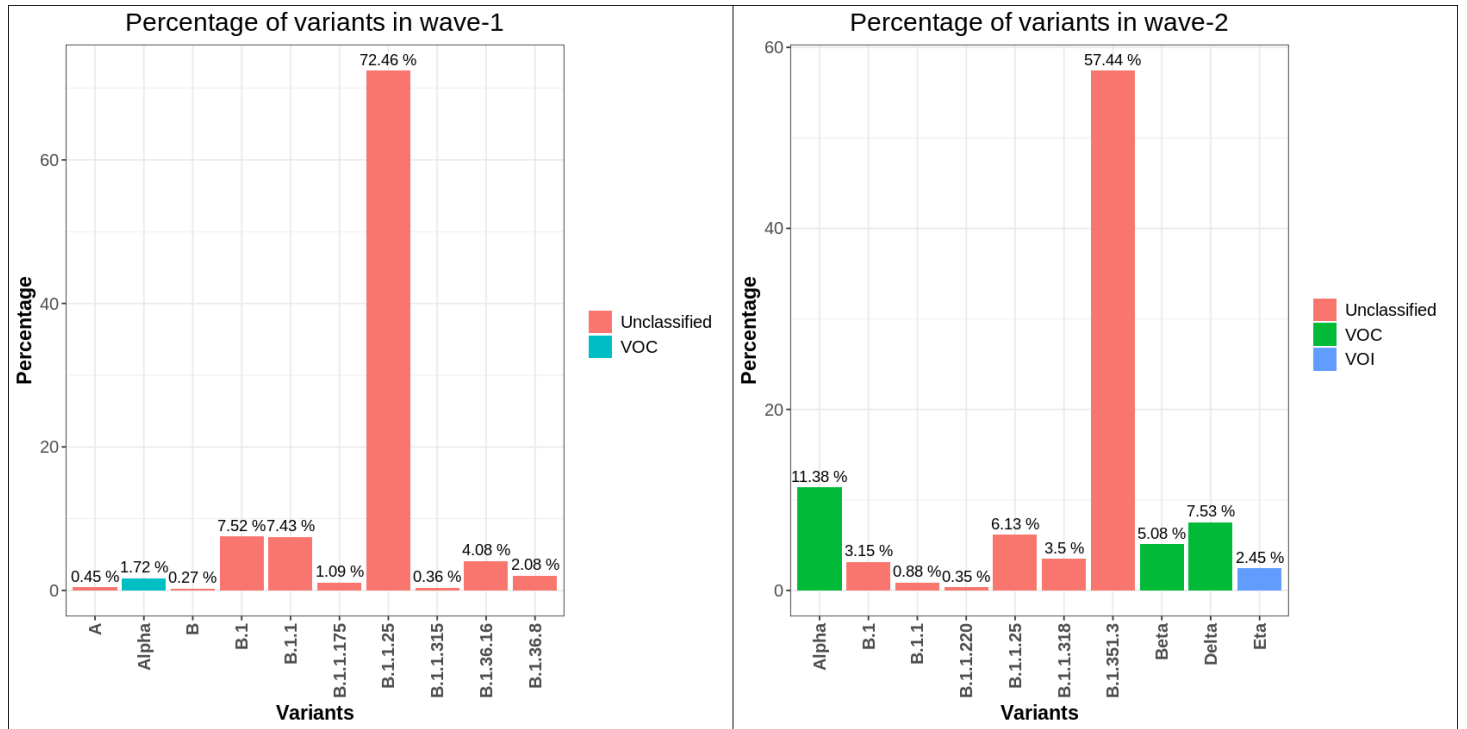

748

749

750

751

752

753

754

755

756

757

758

759



**Root Mean Square Deviation (RMSD)**

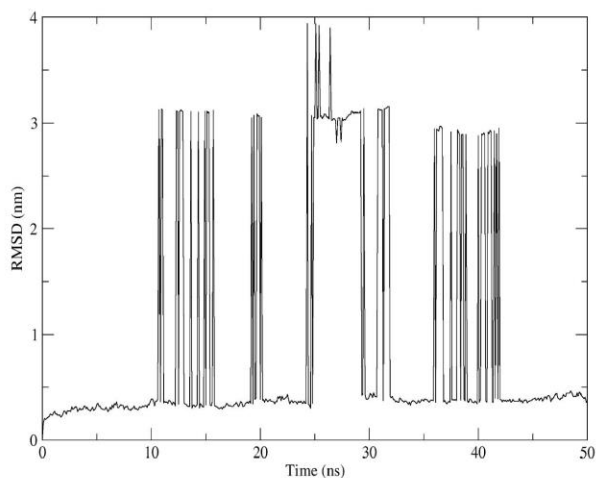

**(I)**

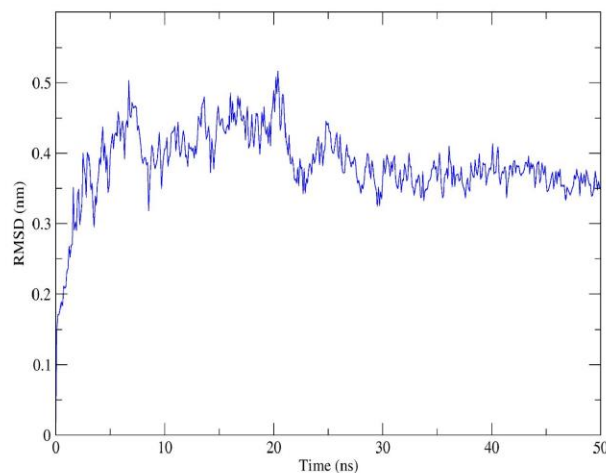

**(II)**

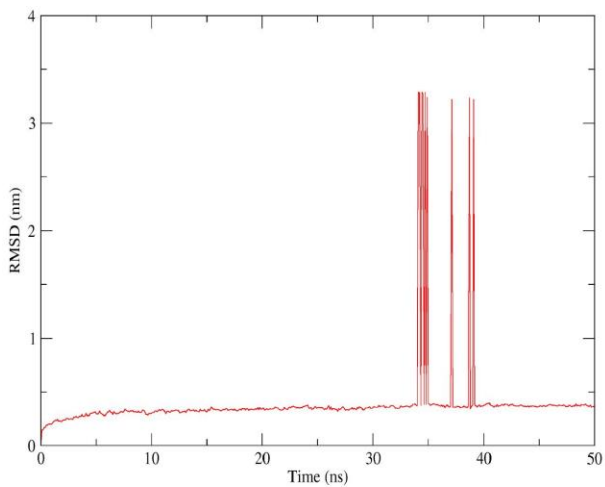

**(III)**

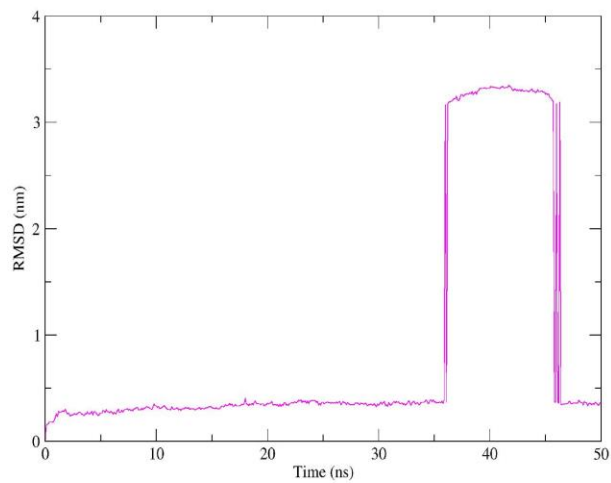

**(IV)**

761

762

763

764

765

**Root Mean Square Fluctuation (RMSF)**

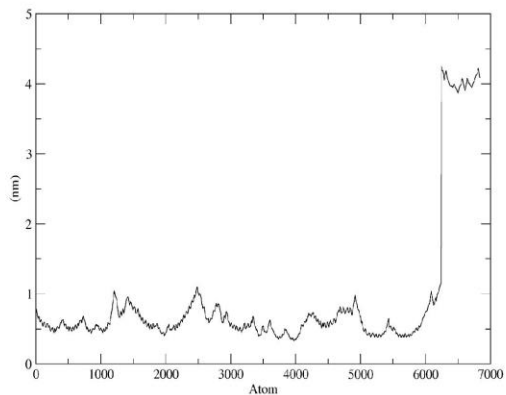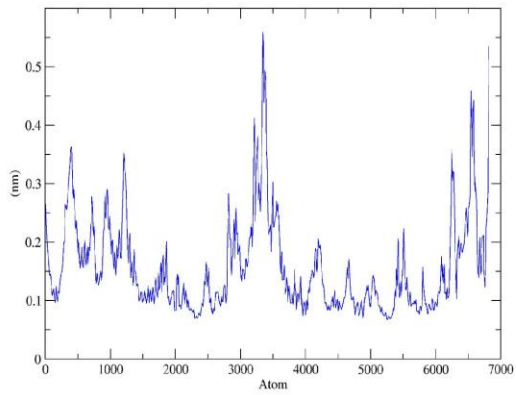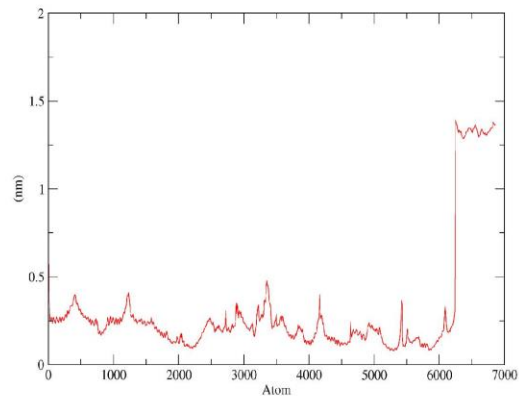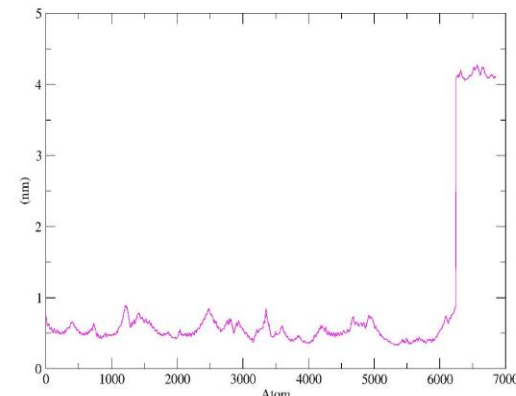

767

768

769

770

771

772

773 **Fig 9c**

774

### Radius of Gyration (Rg)

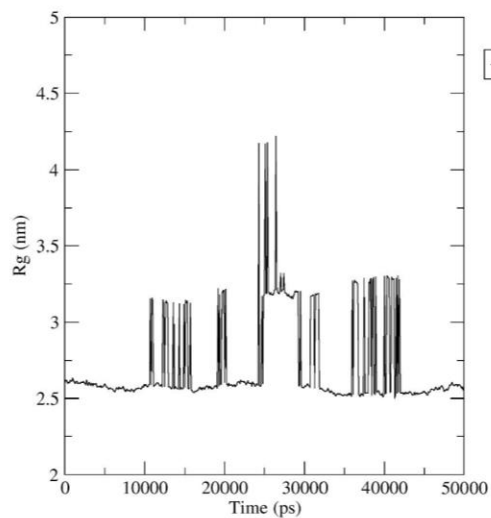

**(I)**

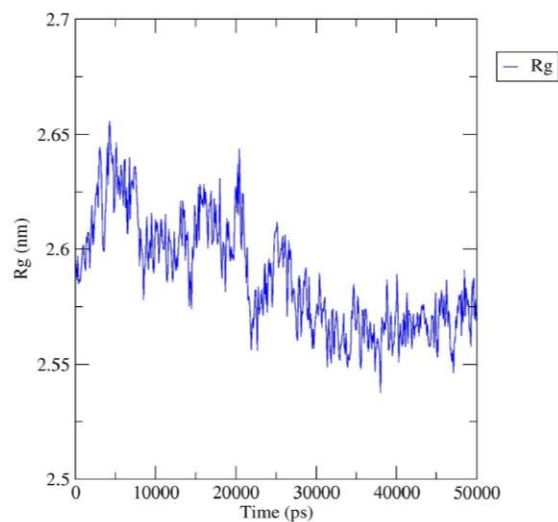

**(II)**

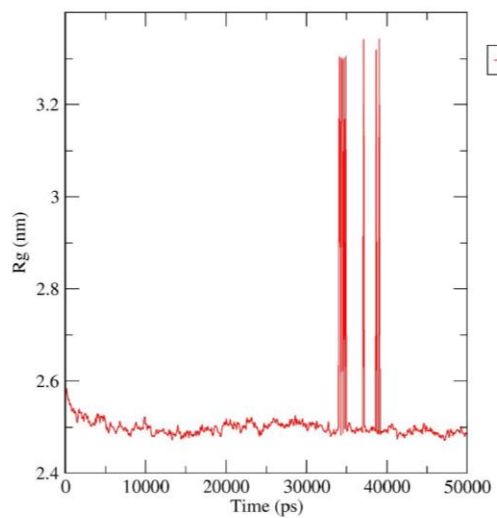

**(III)**

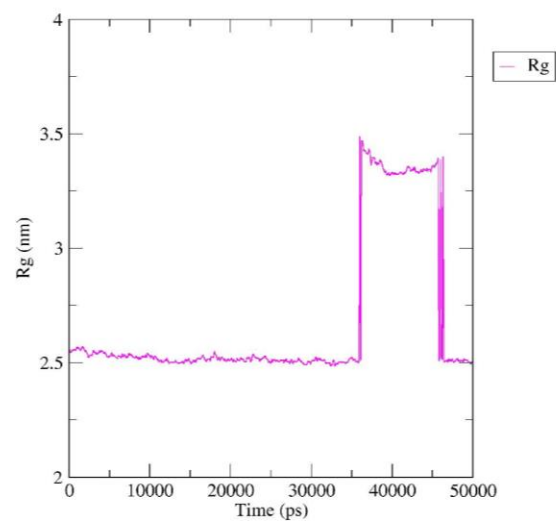

**(IV)**

775

776

777

**Solvent Accessibility Area (SASA)**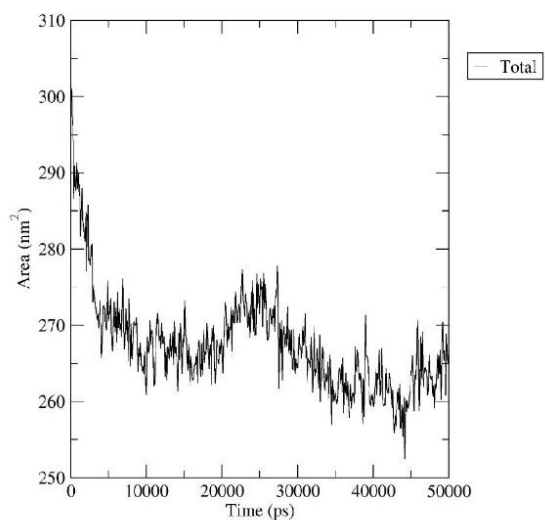**(I)**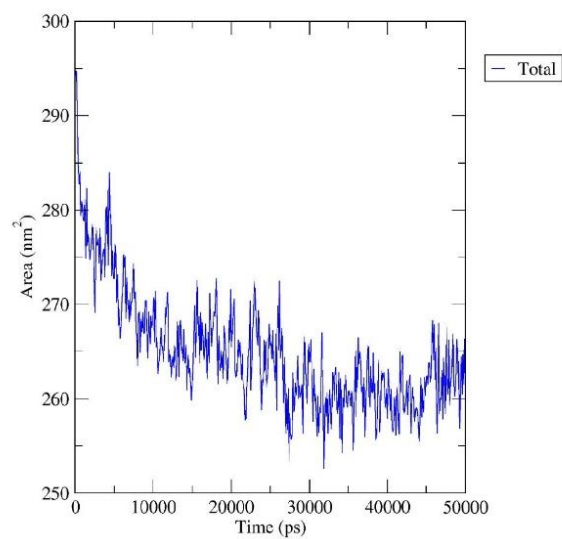**(II)**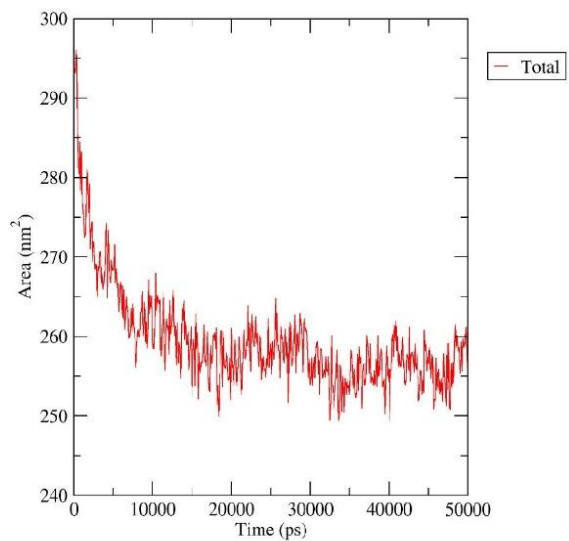**(III)**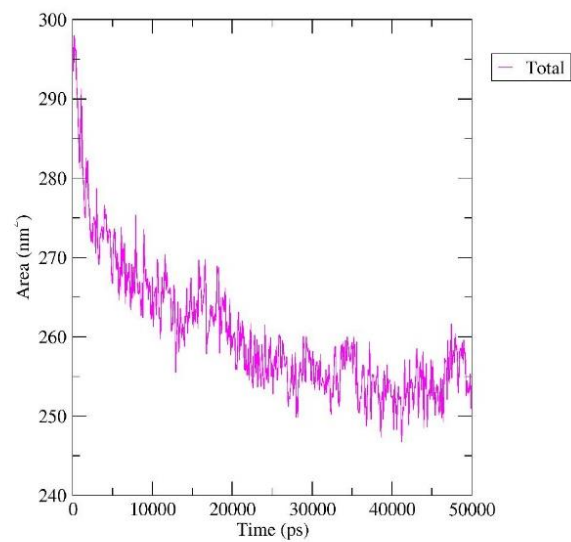**(IV)**

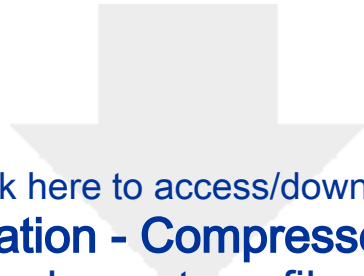

[Click here to access/download](#)

**Supporting Information - Compressed/ZIP File Archive**  
Supplementary\_files.zip

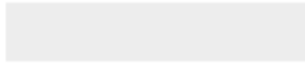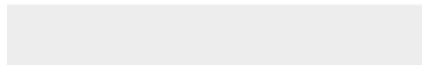

Supplement: pone.0258019.s012.pdf [file pone.0258019.s012.pdf]
